1 **Structure of mycobacterial cytochrome *bcc* in complex with Q203 and TB47, two**  
2 **anti-TB drug candidates**

3  
4 Shan Zhou<sup>1,2,7</sup>, Weiwei Wang<sup>3,7</sup>, Xiaoting Zhou<sup>3</sup>, Yuying Zhang<sup>2</sup>, Yuezheng Lai<sup>2</sup>, Yanting Tang<sup>2</sup>,  
5 Jinxu Xu<sup>2</sup>, Xiaolin Yang<sup>3</sup>, Luke W. Guddat<sup>4</sup>, Quan Wang<sup>3</sup>, Yan Gao<sup>3\*</sup>, Zihe Rao<sup>1,2,3,5,6\*</sup> & Hongri  
6 Gong<sup>2\*</sup>

7 <sup>1</sup>State Key Laboratory of Medicinal Chemical Biology, College of Pharmacy, Nankai University,  
8 Tianjin 300350, China

9 <sup>2</sup>State Key Laboratory of Medicinal Chemical Biology, College of Life Sciences, Nankai University,  
10 Tianjin 300071, China

11 <sup>3</sup>Shanghai Institute for Advanced Immunochemical Studies and School of Life Science and  
12 Technology, ShanghaiTech University, Shanghai 201210, China

13 <sup>4</sup>School of Chemistry and Molecular Biosciences, The University of Queensland, Brisbane, 4072  
14 Queensland, Australia

15 <sup>5</sup>National Laboratory of Biomacromolecules, CAS Center for Excellence in Biomacromolecules,  
16 Institute of Biophysics, CAS, Beijing 100101, China

17 <sup>6</sup>Laboratory of Structural Biology, Tsinghua University, Beijing 100084, China

18 <sup>7</sup>These authors contributed equally

19 \* Email: gaoyan04092020@163.com (Y.G), raozh@tsinghua.edu.cn (Z.R.), gonghr@nankai.edu.cn  
20 (H.G.).

21

22 **Abstract**

23 Pathogenic mycobacteria pose a sustained threat to global human health. Recently, cytochrome *bcc*  
24 complexes have gained interest as targets for antibiotic drug development. However, there is

25 currently no structural information for the cytochrome *bcc* complex from these pathogenic  
26 mycobacteria. Here, we report the structures of *M. tuberculosis* cytochrome *bcc* alone (2.68 Å  
27 resolution) and in complex with clinical drug candidates Q203 (2.67 Å resolution) and TB47 (2.93 Å  
28 resolution) determined by single-particle cryo-electron microscopy. *M. tuberculosis* cytochrome *bcc*  
29 forms a dimeric assembly with endogenous menaquinone/menaquinol bound at the quinone/quinol  
30 binding pockets. Q203 and TB47 are bound to the quinol-binding site. Hydrogen bonds are formed  
31 between the inhibitor and the side chains of  $Q_{crB}$ Thr313 and  $Q_{crB}$ Glu314, residues that are conserved  
32 across pathogenic mycobacteria. These high-resolution structures provide a basis for the design of  
33 new mycobacterial cytochrome *bcc* inhibitors that could be developed into broad spectrum drugs to  
34 treat mycobacterial infections.

35

## 36 **Introduction**

37 Mycobacteria, which belong to the phylum Actinobacteria, have coevolved with humans over  
38 thousands of years (Chisholm et al., 2016). Approximately 200 species of mycobacteria have been  
39 identified that have diverse lifestyles, morphologies, biochemistries and physiologies (Tortoli et al.,  
40 2017). Mycobacteria can broadly be grouped into two categories: tuberculosis-causing mycobacteria  
41 and non-tuberculous mycobacteria (NTM). *Mycobacterium leprae* is often represented in a distinct  
42 genetic clade owing to its genetic and phenotypic differences compared to other mycobacterium  
43 species (Cole et al., 2001). Mycobacteria can be further classified into fast-growing and slow-  
44 growing species or species complexes, these assignments are according to the physiological,  
45 phenotypic and phylogenetic characteristics (Rastogi et al., 2001). Although nearly all mycobacteria  
46 are saprophytes or non-pathogenic to humans, a few species cause diseases resulting in pulmonary  
47 and extra-pulmonary infections that can affect nearly all organs. Infections, which are caused by  
48 strict or opportunistic pathogenic mycobacteria (**Figure 1**) pose a sustained threat to human health.  
49 Of these, tuberculosis (TB), caused by *Mycobacterium tuberculosis* (*Mtb*), is the most serious,

50 leading to ~ 1.2 million fatalities per year (World Health Organization, 2019). Infections involving  
51 other pathogenic mycobacteria, e.g. *M. abscessus* and *M. avium complex*, are on the rise with some  
52 outnumbering those caused by *M. tuberculosis* in countries including the United States (Donohue,  
53 2018; Johansen et al., 2020). These infections are notoriously difficult to treat due to intrinsic or  
54 emerging resistance to many common antibiotics, thus exacerbating the challenge to find suitable  
55 drug targets.

56 Oxidative phosphorylation (OXPHOS) has gained interest as a target space for antibiotic drug  
57 development (Cook et al., 2017; Hards et al., 2020). In OXPHOS, the protein complexes of the  
58 electron transport chain (ETC) establish a proton motive force (PMF) across a biomembrane that  
59 drives the synthesis of adenosine triphosphate (ATP) by ATP synthase (Mitchell, 1961).  
60 Maintenance of PMF and ATP homeostasis is required for the survival of both replicative and non-  
61 replicative (often referred to as dormant) mycobacteria and its dissipation leads to a rapid loss of cell  
62 viability and cell death (Koul et al., 2008; Rao et al., 2008). The reliance on the PMF and ATP  
63 homeostasis thus highlights the importance of the mycobacterial proton-pumping cytochrome *bcc-*  
64 *aa<sub>3</sub>* supercomplex, which consists of a *bcc* menaquinol reductase (complex III, CIII) and an *aa<sub>3</sub>*  
65 oxidase (complex IV, CIV) that are tightly associated (Gong et al., 2018; Kim et al., 2015; Megehee  
66 et al., 2006). Several studies support the attractiveness of cytochrome *bcc-aa<sub>3</sub>* for mycobacterial drug  
67 development (de Jager et al., 2020; Liu et al., 2019; Lu et al., 2018; Pethe et al., 2013; Scherr et al.,  
68 2018). Given the strict sequence conservation of this complex (**Figure 1**), broad spectrum activity of  
69 a therapeutic within the pathogenic mycobacteria is likely (Lee et al., 2020). Interestingly, all the  
70 cytochrome *bcc-aa<sub>3</sub>* inhibitors published to date appear to target the QcrB subunit (**Figure 1**) of the  
71 cytochrome *bcc* complex and are likely bound to the menaquinol binding (Qp) site of the QcrB  
72 subunit (Lee et al., 2020). The most advanced of these are Q203 and TB47, which have been shown  
73 to clear infections due to *M. tuberculosis* (de Jager et al., 2020; Lu et al., 2018; Pethe et al., 2013)  
74 and *M. ulcerans* (Liu et al., 2019; Scherr et al., 2018). Q203 has recently completed phase II clinical

75 trials for TB treatment (ClinicalTrials.gov number, NCT03563599) (de Jager et al., 2020). TB47 has  
76 also been evaluated in a preclinical study (<http://www.newtbdrugs.org/pipeline/discovery>).

77 To progress an understanding of the cytochrome *bcc* structure and its interaction with new drug  
78 leads, here we have determined the atomic resolution cryo-electron microscopy (cryo-EM) structures  
79 of *M. tuberculosis* cytochrome *bcc* alone (2.68 Å resolution) and in complex with Q203 (2.67 Å  
80 resolution) and TB47 (2.93 Å resolution). The high resolution *M. tuberculosis* cytochrome *bcc*  
81 structures will greatly accelerate efforts towards structure-guided drug discovery for pathogenic  
82 mycobacteria including *M. tuberculosis*.

83

## 84 **Results and Discussion**

### 85 **Structure of *M. tuberculosis* cytochrome *bcc***

86 A hybrid supercomplex consisting of *M. tuberculosis* CIII and *Mycobacterium smegmatis* CIV was  
87 purified and its structure determined by cryo-EM to an overall resolution of 2.68 Å (**Figure 2-figure**  
88 **supplement 1; Supplementary file 1**). The *M. tuberculosis* cytochrome *bcc* is dimeric similar to the  
89 *M. smegmatis* *bcc* complex in the CIII/CIV supercomplex (Gong et al., 2018) and the bovine  
90 mitochondrial cytochrome *bc*<sub>1</sub> complex (Iwata et al., 1998) (**Figure 2A, B**). The dimensions of the  
91 complex are 140 Å by 70 Å by 100 Å (**Figure 2A, B**). Three canonical subunits QcrA, QcrB and  
92 QcrC with all the prosthetic groups and endogenous menaquinones were clearly assigned in the  
93 unambiguous cryo-EM density (**Figure 2C; Figure 2-figure supplement 2**). QcrA has three  
94 transmembrane helices (TMHs) and has a “U” shaped structure (**Figures 2D, 3A**). The N-terminal  
95 region with TMH1/2 and the TMH3 make up the two arms of the “U” structure. These arms are  
96 linked by the region located near the cytoplasmic side. Attached to QcrA TMH3 is the C-terminal  
97 domain, which faces the periplasmic side of the membrane and holds the [2Fe-2S] cluster in place.  
98 QcrB has eight TMHs (**Figures 2D, 3B**). Four of these are responsible for burying two functionally  
99 important heme *b* cofactors (high potential heme *b*<sub>H</sub> and low potential heme *b*<sub>L</sub>). Both heme *b*<sub>L</sub> and

100 heme  $b_H$  are bound between TMH I/II and TMH III/IV, heme  $b_L$  is near the periplasmic side and  
101 heme  $b_H$  near the cytoplasmic side. QcrC is a transmembrane protein with a C-terminal TMH located  
102 between  $_{QcrB}$ TMH5 and  $_{QcrB}$ TMH7 (**Figures 2D, 3C**). The N-terminal periplasmic portion of QcrC  
103 can be divided into two heme-containing cytochrome *c* domains designated D1 and D2. The D1  
104 domain protrudes out of the core of CIII whereas the D2 domain interacts extensively with QcrA and  
105 QcrB.

### 106 **Quinone and quinone binding pockets of *M. tuberculosis* cytochrome *bcc***

107 Quinone binding sites are often species-dependent and thus are important for drug discovery  
108 (Harikishore et al., 2020; Lee et al., 2020). Two quinone-binding sites could be identified (**Figure**  
109 **3D, E**), the quinol oxidation site ( $Q_P$  site) and the quinone reduction site ( $Q_N$  site). The  $Q_P$  site  
110 responsible for menaquinol ( $MKH_2$ ) oxidation is near heme  $b_L$ , whereas the  $Q_N$  site responsible for  
111 menaquinone (MK) reduction is close to heme  $b_H$  (**Figure 3D, E; Figure 2-figure supplement 2**).  
112 The  $Q_P$  site is at the center of an inverted triangle structure surrounded by helices (**Figure 3D**). One  
113 MK molecule was identified at this site with its naphthoquinone ring surrounded mainly by  
114 hydrophobic residues,  $_{QcrB}$ Phe158,  $_{QcrB}$ Tyr161,  $_{QcrB}$ Leu180,  $_{QcrB}$ Ile183,  $_{QcrB}$ Met310 and  $_{QcrB}$ Met342.  
115 Its hydrophobic tail that contains multiple isoprenoid groups wraps around  $_{QcrB}$ TMH6 down to its  
116 cytoplasmic end by interacting with  $_{QcrB}$ Met187,  $_{QcrB}$ Ala339,  $_{QcrB}$ Leu344 and  $_{QcrB}$ Val347. However,  
117 the edge-to-edge distance from MK to heme  $b_L$  is 15 Å. Thus, we speculate that the endogenous  
118 electron donor  $MKH_2$  should be closer to the heme  $b_L$  to facilitate electron transfer. We speculate  
119 that what is observed here is the oxidized product as it leaves the  $Q_P$  site. It is worth noting that all  
120 the reported inhibitors including Q203 (Pethe et al., 2013) and TB47 (Lu et al., 2018) are suggested  
121 to interact with this  $Q_P$  site. In addition, the  $Q_N$  site is mainly formed by  $_{QcrB}$ TMH1,  $_{QcrB}$ TMH4,  
122  $_{QcrB}$ TMH5 and one loop region of QcrB (**Figure 3E**). The head group of MK is bound in this pocket  
123 interacting with  $_{QcrB}$ Phe39,  $_{QcrB}$ Glu49,  $_{QcrB}$ Leu225,  $_{QcrB}$ Leu232,  $_{QcrB}$ Trp236 and  $_{QcrB}$ Phe262, and its  
124 long hydrophobic tail extends along  $_{QcrB}$ TMH1 towards the periplasmic side. MK/ $MKH_2$  are part of

125 the Q-cycle hypothesis and essential for electron transfer in the cytochrome *bcc* complex (Gong et al.,  
126 2018). In addition, the electron transfer pathway of *M. tuberculosis* cytochrome *bcc* is believed to be  
127 same as that of *M. smegmatis* cytochrome *bcc* based on their highly similar cofactor arrangement  
128 (Gong et al., 2018). Given the crossspecies activity of this complex (Lee et al., 2020) and high  
129 homology of the QcrB subunits across mycobacterial pathogens (**Figure 1**), this data opens the way  
130 for the discovery of broad spectrum mycobacterial agents based on rational, structure-based inhibitor  
131 design principles.

### 132 **Q203 interactions in *M. tuberculosis* cytochrome *bcc* binding pocket**

133 Q203 has recently been subjected to a phase II clinical study for *M. tuberculosis* treatment (de Jager  
134 et al., 2020). This compound has also been shown to be strongly bactericidal against *Mycobacterium*  
135 *ulcerans* (Scherr et al., 2018). It is suggested to be an inhibitor that competes with endogenous  
136 substrate binding (Q<sub>P</sub> site) of the cytochrome *bcc* complex (Pethe et al., 2013), but this hypothesis is  
137 yet to be verified by direct experimental evidence. To obtain atomic information on the mode of  
138 binding of Q203 to cytochrome *bcc*, we have determined the structure of a hybrid supercomplex as  
139 described above in the presence of Q203 by cryo-EM to an overall resolution of 2.67 Å (**Figure 4-**  
140 **figure supplement 1 and figure supplement 2; Supplementary file 1**). The cryo-EM map shows that  
141 close to the Q<sub>P</sub> binding pocket within the membrane of each QcrB of cytochrome *bcc*, density for  
142 Q203 is present (**Figure 4A, B**). All of the Q203 molecules fill each QcrB subunit binding deeply  
143 into the Q<sub>P</sub> pocket and with identical binding modes. The key interactions that anchor Q203 are (i) a  
144 hydrogen bond between the hydroxyl oxygen of the side chain of Q<sub>crB</sub>Thr313 and the amine in the  
145 carboxamide linker of Q203 (3.0 Å), (ii) a halogen bond between the chlorine atom of the  
146 trifluoromethyl group and an ordered water molecule that simultaneously forms a hydrogen bond  
147 with the hydroxyl oxygen of the side chain of Q<sub>crB</sub>Tyr164, (iii) a hydrogen bond between the side  
148 chain of Q<sub>crB</sub>Glu314 and the nitrogen atom in the imidazopyridine ring (3.0 Å), and (iv) a hydrogen  
149 bond between the side chain of Q<sub>crA</sub>His375 and the nitrogen atom in the imidazopyridine ring (2.98 Å)

150 (**Figure 4C**). In addition, the carbon atoms of Q203 interacts with Gly<sup>175</sup>, Ala<sup>179</sup>, Leu<sup>180</sup>, Thr<sup>184</sup>,  
151 Ser<sup>304</sup>, Pro<sup>306</sup>, Met<sup>310</sup>, Ala<sup>317</sup> and Met<sup>342</sup> through hydrophobic interactions. These residues are within  
152 helices adjacent to QcrB. Consistent with these findings, functional studies have shown that  
153 substitution of Q<sub>crB</sub>Thr313 to alanine confers resistance to the Q203 (Pethe et al., 2013). Interestingly,  
154 the binding of Q203 involves residues from both QcrA and QcrB. Due to the need to form stabilizing  
155 interactions between subunits, resistance may be more difficult to achieve here than if the site  
156 involved only one subunit. Furthermore, the mapping of reported mutations in Q203-resistant *M.*  
157 *tuberculosis* reveals that they are positioned directly where Q203 binds in this structure (Lupien et al.,  
158 2020) (**Figure 4-figure supplement 3**).

#### 159 **TB47 binding mode of *M. tuberculosis* cytochrome *bcc***

160 TB47, currently being evaluated in preclinical studies, has also been reported to target the QcrB of  
161 cytochromes *bcc* from *M. tuberculosis* (Lu et al., 2018) and *M. ulcerans* (Liu et al., 2019). Here we  
162 have determined its structure in complex with the hybrid mycobacterial cytochrome *bcc*. The 2.93 Å  
163 cryo-EM map shows density for TB47 and confirms that it binds in the same location as Q203  
164 (**Figure 5A, B; Figure 5-figure supplement 1 and figure supplement 2; Supplementary file 1**).  
165 Three hydrogen bond interactions are observed involving the side chains of Q<sub>crB</sub>Thr313, Q<sub>crB</sub>Glu314,  
166 and Q<sub>crA</sub>His375. Similar interactions are also observed when Q203 binds (**Figure 5C**). Tyr<sup>161</sup>, Leu<sup>171</sup>,  
167 Gly<sup>175</sup>, Ala<sup>179</sup>, Leu<sup>180</sup>, Thr<sup>184</sup>, Met<sup>187</sup>, Leu<sup>194</sup>, Ser<sup>304</sup>, Gly<sup>305</sup> and Met<sup>342</sup> also contribute to TB47  
168 binding, largely through hydrophobic interactions (**Figure 5C**). A mutation in TB47-resistant *M.*  
169 *smegmatis* (*M. tuberculosis*: H195Y) is positioned close to the Qp-binding site (Lu et al., 2018)  
170 (**Figure 5-figure supplement 3**). As a result, it causes indirect steric interference with the binding of  
171 TB47, thus this structure provides the molecular basis for conferring resistance.

#### 172 **Specificity of Q203 and TB47 for mycobacterial cytochromes *bcc* complex**

173 The basis for the high specificity of Q203 and TB47 toward the Qp site of mycobacterial  
174 cytochromes *bcc* becomes apparent in the structural comparison between the QcrB subunit of *M.*

175 *tuberculosis* and counterparts from other species (**Figure 6**). The highly conserved residues that are  
176 involved in the binding of these two molecules in this region (**Figure 6-figure supplement 1**) suggest  
177 a consistent overall fold and binding site exists in mycobacteria. This is also in agreement with the  
178 fact that Q203 and TB47 show antimycobacterial activity across many species (de Jager et al., 2020;  
179 Liu et al., 2019; Lu et al., 2018; Pethe et al., 2013; Scherr et al., 2018). In contrast, in other  
180 prokaryotic, eukaryotic and human Qp-binding pockets, for example, from *Saccharomyces*  
181 *cerevisiae* (Lange and Hunte, 2002), *Rhodobacter sphaeroides* (Esser et al., 2008) or human (Guo et  
182 al., 2017), many of the observed interactions would be sterically hindered (**Figure 6**). This suggests  
183 that Q203 and TB47 should have low binding affinity toward its counterpart QcrB in non-  
184 mycobacterial bacteria and in eukaryotes. Coincidentally, the residues contributing to the clashes of  
185 Q203 and TB47 in the Qp binding pockets are commonly observed (**Figure 6**). Even if there is some  
186 flexibility in the Qp binding pocket that enables some level of binding, key residues that enable the  
187 binding of Q203 and TB47 in the mycobacteria are not present in other bacteria and eukaryotes  
188 (**Figure 6-figure supplement 1**). These observations correlate with low general antibacterial activity  
189 and low cytotoxicity for Q203 and TB47 (Liu et al., 2019; Lu et al., 2018; Pethe et al., 2013; Scherr  
190 et al., 2018).

### 191 **Implication of Q203 and TB47 inhibitory mechanism**

192 To gain further insights into the mechanism of action of Q203, we compared the structures of *M.*  
193 *tuberculosis* cytochrome *bcc* in the presence and absence of Q203 (**Figure 7-figure supplement 1A**).  
194 The structure of apo cytochrome *bcc* is almost identical with the Q203-bound structure (rmsd of  
195 0.497 Å for all Ca atoms), which suggests that Q203 binding does not significantly affect the  
196 overall architecture of cytochrome *bcc*. A comparison of the Q203-bound and Q203-free cytochrome  
197 *bcc* structures shows residues involved in the binding pocket move outward, thus adapting to the  
198 shape of Q203 (**Figure 7-figure supplement 1B**). Specifically, the side chains of  $_{\text{QcrB}}\text{Ser304}$ ,  
199  $_{\text{QcrB}}\text{Glu313}$ ,  $_{\text{QcrB}}\text{Glu314}$  and  $_{\text{QcrB}}\text{Met342}$  undergo significant conformational changes to form



200 hydrogen bonds to Q203. The binding of TB47 to *M. tuberculosis* cytochrome *bcc* also induces very  
201 similar conformational changes in the Qp binding pocket to those seen for Q203 (rmsd of 0.454 Å  
202 for all Ca atoms) (**Figure 7-figure supplement 1B**). Differences in binding are due to the different  
203 ethyl group and methyl moieties in the head groups of Q203 and TB47, respectively. It is also  
204 important to note that one endogenous substrate molecule is also bound to the Qp site in the apo  
205 structure of cytochrome *bcc*, which potentially affects the evaluation of the conformational changes  
206 upon the binding of Q203 or TB47.

207 When analyzing the superimposed structures (**Figure 7-figure supplement 1**), it is apparent that  
208 Q203 and TB47 act competitively with the quinol binding as they almost completely occupy the Qp  
209 pocket. We therefore conclude that Q203 and TB47 are bona fide analogs of the substrate, and thus  
210 ultimately function by hindering the downstream synthesis of ATP (**Figure 7A**). These two  
211 compounds are also highly bactericidal against *M. ulcerans*, almost certainly targeting the Qp-  
212 binding site (Liu et al., 2019; Scherr et al., 2018). In summary, the sequences of the QcrB subunits  
213 have high homology across pathogenic mycobacteria (Lee et al., 2020) and the essential residues  
214 (Q<sub>crB</sub>Glu313 and Q<sub>crB</sub>Glu314) that are involved in hydrogen-bonding interactions with the inhibitors  
215 (Pethe et al., 2013; Scherr et al., 2018) are conserved across pathogenic mycobacteria (**Figure 7B**).

216

## 217 **Conclusions**

218 We have determined the apo- and Q203 and Tb47-bound structures of a hybrid pathogenic *M.*  
219 *tuberculosis/M. smegmatis* cytochrome *bcc* complex. The study shows the structural features of *M.*  
220 *tuberculosis* cytochrome *bcc* of and how it is specifically inhibited by Q203 and TB47. The  
221 extensive interactions between Q203 or TB47 and the Qp binding pocket account for the highly  
222 specific binding of these two inhibitors to pathogenic *M. tuberculosis* cytochromes *bcc* compared to  
223 eukaryotic counterparts. Two conservative residues involved with the formation of hydrogen bonds  
224 are observed across the pathogenic mycobacteria. These structures provide a long-sought basis for

225 rational, structure-based inhibitor design to accelerate the development of Q203 and TB47 analogs as  
 226 drug leads for mycobacterial infections.

227

## 228 **Materials and Methods**

### 229 **Key resources table**

| <b>REAGENT or RESOURCE</b>                           | <b>SOURCE</b>            | <b>IDENTIFIER</b>                                                                                                                 |
|------------------------------------------------------|--------------------------|-----------------------------------------------------------------------------------------------------------------------------------|
| <b>Bacterial and Virus Strains</b>                   |                          |                                                                                                                                   |
| <i>M. smegmatis</i> MC <sup>2</sup> 51               | (Li et al., 2014)        |                                                                                                                                   |
| <b>Chemicals, Peptides, and Recombinant Proteins</b> |                          |                                                                                                                                   |
| Lauryl Maltose Neopentyl Glycol (LMNG)               | Anatrace                 | Cat# NG310                                                                                                                        |
| Digitonin                                            | BIOSYNTH                 | Cat# D-3200                                                                                                                       |
| <b>Critical Commercial Assays</b>                    |                          |                                                                                                                                   |
| Ni-NTA Agarose                                       | QIAGEN                   | Cat# 30230                                                                                                                        |
| Superdex 200 increase                                | GE Healthcare            | Cat# 28990944                                                                                                                     |
| <b>Deposited Data</b>                                |                          |                                                                                                                                   |
| EM map apo complex                                   | This paper               | EMDB code: EMD-30943                                                                                                              |
| Apo complex structure                                | This paper               | PDB code: 7E1V                                                                                                                    |
| EM map Q203-bound complex                            | This paper               | EMDB code: EMD-30944                                                                                                              |
| Q203-bound complex structure                         | This paper               | PDB code: 7E1W                                                                                                                    |
| EM map TB47-bound complex                            | This paper               | EMDB code: EMD-30945                                                                                                              |
| TB47-bound complex structure                         | This paper               | PDB code: 7E1X                                                                                                                    |
| <b>Software and Algorithms</b>                       |                          |                                                                                                                                   |
| SerialEM                                             | (Mastronarde, 2003)      | <a href="http://bio3d.colorado.edu/SerialEM/">http://bio3d.colorado.edu/SerialEM/</a>                                             |
| MotionCor2                                           | (Zheng et al., 2017)     | <a href="https://emcore.ucsf.edu/ucsf-motioncor2">https://emcore.ucsf.edu/ucsf-motioncor2</a>                                     |
| RELION                                               | (Zivanov et al., 2019)   | <a href="https://www2.mrc-lmb.cam.ac.uk/relion">https://www2.mrc-lmb.cam.ac.uk/relion</a>                                         |
| cryoSPARC                                            | (Punjani et al., 2017)   | <a href="https://cryosparc.com/">https://cryosparc.com/</a>                                                                       |
| Phyre2                                               | (Kelley et al., 2015)    | <a href="http://www.sbg.bio.ic.ac.uk/phyre2/html/page.cgi?id=index">http://www.sbg.bio.ic.ac.uk/phyre2/html/page.cgi?id=index</a> |
| UCSF Chimera                                         | (Pettersen et al., 2004) | <a href="https://www.cgl.ucsf.edu/chimera/">https://www.cgl.ucsf.edu/chimera/</a>                                                 |
| COOT                                                 | (Emsley et al., 2010)    | <a href="https://www2.mrc-lmb.cam.ac.uk/personal/pemsley/coot/">https://www2.mrc-lmb.cam.ac.uk/personal/pemsley/coot/</a>         |
| PHENIX                                               | (Adams et al., 2010)     | <a href="https://www.phenix-">https://www.phenix-</a>                                                                             |

|                                         |                     |                                                                         |
|-----------------------------------------|---------------------|-------------------------------------------------------------------------|
| PyMOL                                   | (Schrodinger, 2010) | <a href="https://pymol.org/2/">online.org/<br/>https://pymol.org/2/</a> |
| <b>Other</b>                            |                     |                                                                         |
| 100kDa cutoff concentrators             | Sartorius           | Cat# VS0642                                                             |
| R0.6/1.0 300 mesh Cu holey carbon grids | Quantifoil          |                                                                         |

230

### 231 **Expression of hybrid supercomplex consisting of *Mtb* CIII and *Msm* CIV**

232 The hybrid supercomplex was obtained according to a previous study (Kim et al., 2015) but with  
233 some modifications. The *Mtb* cytochrome *bcc* complex is encoded by three putative genes (Rv2194-  
234 2196). Genes were amplified from H37Rv genomic DNA by PCR using Phanta Max DNA  
235 polymerase (Vazyme), and two steps PCR was used to inset a 10 × His tag at the C-terminus of the  
236 *qcrB* (Rv2196). Genes encoding the entire cytochrome *bcc* complex operon were then cloned into  
237 the vector pVV16. The resultant plasmid was transformed into *M. smegmatis* mc<sup>2</sup> 51 (Li et al., 2014)  
238 cells whose *qcrCAB* operon encoding *Msm* cytochrome *bcc* had already been knocked out. The cells  
239 were cultivated in Luria-Bertain broth (LB) liquid media supplemented with 50 µg/mL hygromycin,  
240 25 µg/mL streptomycin and 0.1% Tween 80. Cell pellets were harvested by centrifugation when the  
241 cells were grown to an optical density (OD<sub>600</sub> of 1.0-1.2) at 37 °C (220rpm). Harvested cells were  
242 frozen at -80 °C until use.

### 243 **Purification of the hybrid supercomplex**

244 Cell pellets were thawed and resuspended in buffer A containing 20 mM MOPS, pH 7.4, 100 mM  
245 NaCl, and then lysed by passing through a French Press at 1,200bar three times. Cell debris and non-  
246 lysed cells were removed by centrifugation at 14,000 rpm for 10 min at 4 °C. The supernatant was  
247 collected and ultra-centrifuged at 36,900 rpm and 4 °C for 2 h. The membrane fraction was  
248 solubilized by addition of 1% (w/v) LMNG (lauryl maltose neopentyl glycol) in buffer A and  
249 incubated for 2 h at 4 °C with slow stirring. The suspension was ultra-centrifuged and the supernatant  
250 was applied to Ni-NTA agarose beads (GE Healthcare) at 4 °C. The beads were further washed in  
251 buffer A with 50 mM imidazole and 0.004% (w/v) LMNG. The buffer was exchanged to buffer B

252 (20 mM MOPS, pH 7.4, 100 mM NaCl and 0.1% (w/v) digitonin) and then washed in resin in batch  
253 mode. The protein was eluted from the beads with buffer B containing 500 mM imidazole. Protein  
254 was then concentrated and loaded onto a Superdex 6 increase (10/300 GL, GE Healthcare) column  
255 equilibrated in buffer B. Peak fractions were pooled and concentrated to ~ 8 mg/ml for electron  
256 microscopy studies.

### 257 **Cryo sample preparation and data collection**

258 300-mesh Quantifoil R0.6/1.0 grids (Quantifoil, Micro Tools GmbH, Germany) were glow-  
259 discharged at H<sub>2</sub>/O<sub>2</sub> atmosphere for 25s. 3 µL aliquots of protein complex at a concentration of 10  
260 mg/mL were applied to the grid and then blotted for 3s with force 0 at 8°C and 100% humidity using  
261 a Vitrobot IV (Thermo). Images were collected using a Titan Krios 300keV electron microscope  
262 (Thermo), equipped with K3 Summit direct electron detector camera (Gatan). Data was recorded at  
263 29,000× magnification with a calibrated super-resolution pixel size 0.82 Å/pixel. The exposure time  
264 was set to 2.4 s with 40 subframes and a total dose of 60 electrons per Å<sup>2</sup>. All images were  
265 automatically recorded using SerialEM with a defocus range from 1.2 µm to 1.8 µm (Mastronarde,  
266 2003). For the datasets of apo, Q203-bound and TB47-bound *M. tuberculosis* cytochrome *bcc*, a total  
267 of 4,141, 3,763 and 2,968 images were collected, respectively.

### 268 **Image processing**

269 All dose-fractionated stacks were motion-corrected and dose-weighted using MotionCorr2 (Zheng et  
270 al., 2017) in RELION (Zivanov et al., 2019). CTF estimation was conducted using cryoSPARC  
271 patch CTF estimation (Punjani et al., 2017). For the dataset of apo hybrid *M. tuberculosis*  
272 cytochrome *bcc*, 1,208,054 particles were picked automatically using EMD-9610 map as the  
273 template and extracted with a box size of rescaled 256 pixels (binned 2). 327,188 particles were  
274 selected after two rounds of 2D classification. 100,000 particles were used to perform Ab-Initio  
275 reconstruction in four classes, and these four classes were used as 3D volume templates for  
276 heterogeneous refinement with all selected particles. 112,804 particles converged into one class with

277 clear signals and then re-extracted with 512 pixels. Next, this particle set was used to do  
278 homogeneous refinement and local refinement, yielding the final resolution 2.68 Å. For the dataset  
279 of Q203-bound and TB47-bound *M. tuberculosis* cytochrome *bcc*, the data processing was  
280 performed in a similar pipeline, resulting in the final reconstruction resolution at 2.67 Å and 2.93 Å,  
281 respectively (detailed parameters shown in supplementary figures).

## 282 **Model building and validation**

283 The *M. smegmatis* respiratory complex CIII<sub>2</sub>CIV<sub>2</sub> (PDB code: 6ADQ) model (Gong et al., 2018) as  
284 rigid body was fitted into EM density maps using UCSF Chimera 1.12 (Pettersen et al., 2004). Next,  
285 the resultant atomic model was manually modified according to the subunit sequences of *M.*  
286 *tuberculosis* cytochrome *bcc* and refined in COOT 0.8.9.1 (Emsley et al., 2010), followed by real-  
287 space refinement in PHENIX (Adams et al., 2010). The smile strings of Q203 and TB47 were  
288 generated and copied from ChemDraw (Li et al., 2004) and defined in PHENIX eLBOW. Q203 and  
289 TB47 were manually built into the corresponding EM densities. The local resolution map was  
290 calculated in cryoSPARC (Punjani et al., 2017). All reported resolutions were based on the gold-  
291 standard FSC 0.143 criteria (Rosenthal and Henderson, 2003).

## 292 **Creation of Figures**

293 All the figures were created using UCSF Chimera (Pettersen et al., 2004) or PyMOL (Schrodinger,  
294 2010).

## 295 **Data availability:**

296 The accession numbers for the 3D cryo-EM density map of apo, Q203-bound and TB47-bound  
297 hybrid supercomplex in present study are EMD-30943, EMD-30944 and EMD-30945, respectively.

298 The accession numbers for the coordinates for the apo, Q203-bound and TB47-bound hybrid  
299 supercomplex in this study are PDB: 7E1V, PDB: 7E1W and PDB: 7E1X, respectively.

300 Correspondence and requests for materials should be addressed to the corresponding authors. The  
301 following datasets were generated:

| <b>Author(s)</b>                                           | <b>Year</b> | <b>Dataset title</b>                                                                                                                                                   | <b>Dataset URL</b>                                                                                            | <b>Database and Identifier</b>           |
|------------------------------------------------------------|-------------|------------------------------------------------------------------------------------------------------------------------------------------------------------------------|---------------------------------------------------------------------------------------------------------------|------------------------------------------|
| Zhou, S.,<br>Wang, W.,<br>Gao, Y.,<br>Gong, H.,<br>Rao, Z. | 2021        | Cryo-EM structure of apo hybrid respiratory supercomplex consisting of Mycobacterium tuberculosis complexIII and Mycobacterium smegmatis complexIV                     | <a href="https://www.ebi.ac.uk/pdbe/entry/emdb/EMD-30943">https://www.ebi.ac.uk/pdbe/entry/emdb/EMD-30943</a> | Electron Microscopy Data Bank, EMD-30943 |
| Zhou, S.,<br>Wang, W.,<br>Gao, Y.,<br>Gong, H.,<br>Rao, Z. | 2021        | Cryo-EM structure of apo hybrid respiratory supercomplex consisting of Mycobacterium tuberculosis complexIII and Mycobacterium smegmatis complexIV                     | <a href="https://www.rcsb.org/structure/7E1V">https://www.rcsb.org/structure/7E1V</a>                         | Protein Data Bank, 7E1V                  |
| Zhou, S.,<br>Wang, W.,<br>Gao, Y.,<br>Gong, H.,<br>Rao, Z. | 2021        | Cryo-EM structure of hybrid respiratory supercomplex consisting of Mycobacterium tuberculosis complexIII and Mycobacterium smegmatis complexIV in the presence of Q203 | <a href="https://www.ebi.ac.uk/pdbe/entry/emdb/EMD-30944">https://www.ebi.ac.uk/pdbe/entry/emdb/EMD-30944</a> | Electron Microscopy Data Bank, EMD-30944 |
| Zhou, S.,<br>Wang, W.,<br>Gao, Y.,<br>Gong, H.,<br>Rao, Z. | 2021        | Cryo-EM structure of hybrid respiratory supercomplex consisting of Mycobacterium tuberculosis complexIII and Mycobacterium smegmatis complexIV in the presence of Q203 | <a href="https://www.rcsb.org/structure/7E1W">https://www.rcsb.org/structure/7E1W</a>                         | Protein Data Bank, 7E1W                  |
| Zhou, S.,<br>Wang, W.,<br>Gao, Y.,<br>Gong, H.,<br>Rao, Z. | 2021        | Cryo-EM structure of hybrid respiratory supercomplex consisting of Mycobacterium tuberculosis complexIII and Mycobacterium smegmatis complexIV in presence of TB47     | <a href="https://www.ebi.ac.uk/pdbe/entry/emdb/EMD-30945">https://www.ebi.ac.uk/pdbe/entry/emdb/EMD-30945</a> | Electron Microscopy Data Bank, EMD-30945 |
| Zhou, S.,<br>Wang, W.,<br>Gao, Y.,<br>Gong, H.,<br>Rao, Z. | 2021        | Cryo-EM structure of hybrid respiratory supercomplex consisting of Mycobacterium tuberculosis complexIII and Mycobacterium smegmatis complexIV in presence of TB47     | <a href="https://www.rcsb.org/structure/7E1X">https://www.rcsb.org/structure/7E1X</a>                         | Protein Data Bank, 7E1X                  |

302

303

304

## 305 **Acknowledgments**

306 We thank Dr. Chao Peng of the Mass Spectrometry System at the National Facility for Protein  
307 Science in Shanghai (NFPS), Zhangjiang Lab, SARI, China for data collection and analysis and Prof.  
308 Kaixia Mi (CAS Key Laboratory of Pathogenic Microbiology and Immunology, Institute of  
309 Microbiology, CAS) for sharing the strain *M. smegmatis* mc<sup>2</sup> 51. We would like to thank Prof.  
310 Gregory M. Cook (School of Biomedical Sciences, University of Otago, New Zealand) and Prof.  
311 Xiaoyun Lu (School of Pharmacy, Ji'nan University, China) for kindly providing TB47 for this study.  
312 We would also like to thank the Bio-Electron Microscopy Facility of ShanghaiTech University.

## 313 **Additional information**

## 314 **Funding**

| <b>Funder</b>                                          | <b>Grant reference number</b> | <b>Author</b> |
|--------------------------------------------------------|-------------------------------|---------------|
| National Key Research and Development Program of China | 2017YFC0840300                | Zihe Rao      |
| National Key Research and Development Program of China | 2020YFA0707500                | Zihe Rao      |
| National Natural Science Foundation of China           | 81520108019                   | Zihe Rao      |
| National Natural Science Foundation of China           | 813300237                     | Zihe Rao      |
| Tianjin Natural Science Foundation                     | 20JCQNJC01430                 | Hongri Gong   |

315

## 316 **Author contributions**

317 Shan Zhou, Data curation, Formal analysis, Methodology, Writing—original draft, Writing—review  
318 and editing; Weiwei Wang, Data curation, Formal analysis, Methodology, Visualization, Writing—  
319 review and editing; Xiaoting Zhou, Yuying Zhang, Yuezheng Lai, Yanting Tang, Jinxu Xu, Xiaolin  
320 Yang, Quan Wang, Formal analysis, Methodology; Luke W. Guddat, Formal analysis, Writing—  
321 review and editing; Yan Gao, Data curation, Formal analysis, Methodology, Visualization,  
322 Writing—review and editing; Zihe Rao, Resources, Supervision, Funding acquisition, Writing—

323 review and editing; Hongri Gong, Conceptualization, Investigation, Funding acquisition, Formal  
324 analysis, Methodology, Writing—original draft, Writing—review and editing.

### 325 **Competing interests**

326 The authors declare no competing interests.

327

### 328 **References**

329 Adams PD, Afonine PV, Bunkoczi G, Chen VB, Davis IW, Echols N, Headd JJ, Hung LW, Kapral GJ,  
330 Grosse-Kunstleve RW, McCoy AJ, Moriarty NW, Oeffner R, Read RJ, Richardson DC, Richardson  
331 JS, Terwilliger TC, Zwart PH. 2010. PHENIX: a comprehensive Python-based system for  
332 macromolecular structure solution. *Acta Crystallographica. Section D: Biological Crystallography*  
333 **66**: 213-221. doi: 10.1107/S0907444909052925.

334 Chisholm RH, Trauer JM, Curnoe D, Tanaka MM. 2016. Controlled fire use in early humans might  
335 have triggered the evolutionary emergence of tuberculosis. *Proceedings of the National Academy of*  
336 *Sciences of the United States of America* **113**: 9051-9056. doi: 10.1073/pnas.1603224113.

337 Cole ST, Eglmeier K, Parkhill J, James KD, Thomson NR, Wheeler PR, Honore N, Garnier T,  
338 Churcher C, Harris D, Mungall K, Basham D, Brown D, Chillingworth T, Connor R, Davies RM,  
339 Devlin K, Duthoy S, Feltwell T, Fraser A, Hamlin N, Holroyd S, Hornsby T, Jagels K, Lacroix C,  
340 Maclean J, Moule S, Murphy L, Oliver K, Quail MA, Rajandream MA, Rutherford KM, Rutter S,  
341 Seeger K, Simon S, Simmonds M, Skelton J, Squares R, Squares S, Stevens K, Taylor K, Whitehead  
342 S, Woodward JR, Barrell BG. 2001. Massive gene decay in the *leprosy bacillus*. *Nature* **409**: 1007-  
343 1011. doi: 10.1038/35059006.

344 Cook GM, Hards K, Dunn E, Heikal A, Nakatani Y, Greening C, Crick DC, Fontes FL, Pethe K,  
345 Hasenoehrl E, Berney M. 2017. Oxidative phosphorylation as a target space for tuberculosis: success,  
346 caution, and future directions. *Microbiology spectrum* **5**: 295-316. doi:  
347 10.1128/microbiolspec.TB2-0014-2016.



- 348 de Jager VR, Dawson R, van Niekerk C, Hutchings J, Kim J, Vanker N, van der Merwe L, Choi J,  
349 Nam K, Diacon AH. 2020. Telacebec (Q203), a new antituberculosis agent. *New England Journal of*  
350 *Medicine* **382**: 1280-1281. doi: 10.1056/NEJMc1913327.
- 351 Donohue MJ. 2018. Increasing nontuberculous mycobacteria reporting rates and species diversity  
352 identified in clinical laboratory reports. *BMC Infectious Diseases* **18**: 163. doi: 10.1186/s12879-018-  
353 3043-7.
- 354 Emsley P, Lohkamp B, Scott WG, Cowtan K. 2010. Features and development of Coot. *Acta*  
355 *Crystallogr D Biol Crystallogr* **66**: 486-501. doi: 10.1107/s0907444910007493.
- 356 Esser L, Elberry M, Zhou F, Yu CA, Yu L, Xia D. 2008. Inhibitor-complexed structures of the  
357 cytochrome *bc<sub>1</sub>* from the photosynthetic bacterium *Rhodobacter sphaeroides*. *Journal of Biological*  
358 *Chemistry* **283**: 2846-2857. doi: 10.1074/jbc.M708608200.
- 359 Gong H, Li J, Xu A, Tang Y, Ji W, Gao R, Wang S, Yu L, Tian C, Li J, Yen HY, Man Lam S, Shui G,  
360 Yang X, Sun Y, Li X, Jia M, Yang C, Jiang B, Lou Z, Robinson CV, Wong LL, Guddat LW, Sun F,  
361 Wang Q, Rao Z. 2018. An electron transfer path connects subunits of a mycobacterial respiratory  
362 supercomplex. *Science* **362**: eaat8923. doi: 10.1126/science.aat8923.
- 363 Guo R, Zong S, Wu M, Gu J, Yang M. 2017. Architecture of human mitochondrial respiratory  
364 megacomplex I<sub>2</sub>III<sub>2</sub>IV<sub>2</sub>. *Cell* **170**: 1247-1257. e1212. doi: 10.1016/j.cell.2017.07.050
- 365 Hards K, Adolph C, Harold LK, McNeil MB, Cheung CY, Jinich A, Rhee KY, Cook GM. 2020. Two  
366 for the price of one: Attacking the energetic-metabolic hub of mycobacteria to produce new  
367 chemotherapeutic agents. *Progress in Biophysics and Molecular Biology* **152**: 35-44. doi:  
368 10.1016/j.pbiomolbio.2019.11.003.
- 369 Harikishore A, Chong SSM, Ragunathan P, Bates RW, Grüber G. 2021. Targeting the menaquinol  
370 binding loop of mycobacterial cytochrome *bd* oxidase. *Molecular diversity* **25**: 517-524. doi:  
371 10.1007/s11030-020-10034-0
- 372 Iwata S, Lee JW, Okada K, Lee JK, Iwata M, Rasmussen B, Link TA, Ramaswamy S, Jap BK. 1998.

- 373 Complete structure of the 11-subunit bovine mitochondrial cytochrome *bc<sub>1</sub>* complex. *Science* **281**:  
374 64-71. doi: 10.1126/science.281.5373.64
- 375 Johansen MD, Herrmann JL, Kremer L. 2020. Non-tuberculous mycobacteria and the rise of  
376 *Mycobacterium abscessus*. *Nature Reviews: Microbiology* **18**: 392-407. doi: 10.1038/s41579-020-  
377 0331-1.
- 378 Kelley LA, Mezulis S, Yates CM, Wass MN, Sternberg MJ. 2015. The Phyre2 web portal for protein  
379 modeling, prediction and analysis. *Nature Protocols* **10**: 845–858. doi: 10.1038/nprot.2015.053.
- 380 Kim M-S, Jang J, Rahman NBA, Pethe K, Berry EA, Huang L-S. 2015. Isolation and  
381 characterization of a hybrid respiratory supercomplex consisting of *Mycobacterium tuberculosis*  
382 cytochrome *bcc* and *Mycobacterium smegmatis* cytochrome *aa<sub>3</sub>*. *The Journal of biological chemistry*  
383 **290**: 14350-14360. doi: 10.1074/jbc.M114.624312
- 384 Koul A, Vranckx L, Dendouga N, Balemans W, Van den Wyngaert I, Vergauwen K, Gohlmann HWH,  
385 Willebrords R, Poncelet A, Guillemont J, Bald D, Andries K. 2008. Diarylquinolines are bactericidal  
386 for dormant mycobacteria as a result of disturbed ATP homeostasis. *Journal of Biological Chemistry*  
387 **283**: 25273-25280. doi: 10.1074/jbc.M803899200.
- 388 Lange C, Hunte C. 2002. Crystal structure of the yeast cytochrome *bc<sub>1</sub>* complex with its bound  
389 substrate cytochrome *c*. *Proceedings of the National Academy of Sciences of the United States of*  
390 *America* **99**: 2800-2805. doi: 10.1073/pnas.052704699.
- 391 Lee BS, Sviriaeva E, Pethe K. 2020. Targeting the cytochrome oxidases for drug development in  
392 mycobacteria. *Progress in biophysics and molecular biology* **152**: 45-54. doi:  
393 10.1016/j.pbiomolbio.2020.02.001
- 394 Li X, Liu F, Hu Y, Mi K. 2014. Draft Genome Sequence of mc<sup>2</sup>51, a Highly Hydrogen Peroxide-  
395 Resistant *Mycobacterium smegmatis* Mutant Strain. *Genome announcements* **2**: doi:  
396 10.1128/genomeA.00092-14.
- 397 Li Z, Wan H, Shi Y, Ouyang P. 2004. Personal experience with four kinds of chemical structure

398 drawing software: review on ChemDraw, ChemWindow, ISIS/Draw, and ChemSketch. *Journal of*  
399 *chemical information and computer science* **44**: 1886-1890. doi: 10.1021/ci049794h.

400 Liu Y, Gao Y, Liu J, Tan Y, Liu Z, Chhotaray C, Jiang H, Lu Z, Chiwala G, Wang S. 2019. The  
401 compound TB47 is highly bactericidal against *Mycobacterium ulcerans* in a Buruli ulcer mouse  
402 model. *Nature communications* **10**: 1-9. doi: 10.1371/journal.ppat.1008270.

403 Lu X, Williams Z, Hards K, Tang J, Cheung C-Y, Aung HL, Wang B, Liu Z, Hu X, Lenaerts A. 2018.  
404 Pyrazolo [1, 5-a] pyridine inhibitor of the respiratory cytochrome *bcc* complex for the treatment of  
405 drug-resistant tuberculosis. *ACS infectious diseases* **5**: 239-249. doi: 10.1021/acsinfecdis.8b00225

406 Lupien A, Foo CS-Y, Savina S, Vocat A, Piton J, Monakhova N, Benjak A, Lamprecht DA, Steyn AJ,  
407 Pethe K, Makarov VA, Cole ST. 2020. New 2-Ethylthio-4-methylaminoquinazoline derivatives  
408 inhibiting two subunits of cytochrome *bc<sub>1</sub>* in *Mycobacterium tuberculosis*. *PLoS pathogens* **16**:  
409 e1008270. doi: 10.1371/journal.ppat.1008270

410 Mastronarde DN. 2003. SerialEM: a program for automated tilt series acquisition on Tecnai  
411 microscopes using prediction of specimen position. *Microscopy and Microanalysis* **9**: 1182-1183. doi:  
412 10.1017/S1431927603445911

413 Megehee JA, Hosler JP, Lundrigan MD. 2006. Evidence for a cytochrome *bcc-aa<sub>3</sub>* interaction in the  
414 respiratory chain of *Mycobacterium smegmatis*. *Microbiology (Reading England)* **152**: 823-829. doi:  
415 10.1099/mic.0.28723-0.

416 Mitchell P. 1961. Coupling of phosphorylation to electron and hydrogen transfer by a chemi-osmotic  
417 type of mechanism. *Nature* **191**: 144-148. doi: 10.1038/191144a0

418 World Health Organization. 2019. Global Tuberculosis Report.

419 Pethe K, Bifani P, Jang J, Kang S, Park S, Ahn S, Jiricek J, Jung J, Jeon HK, Cechetto J, Christophe  
420 T, Lee H, Kempf M, Jackson M, Lenaerts AJ, Pham H, Jones V, Seo MJ, Kim YM, Seo M, Seo JJ,  
421 Park D, Ko Y, Choi I, Kim R, Kim SY, Lim S, Yim SA, Nam J, Kang H, Kwon H, Oh CT, Cho Y,  
422 Jang Y, Kim J, Chua A, Tan BH, Nanjundappa MB, Rao SP, Barnes WS, Wintjens R, Walker JR,

- 423 Alonso S, Lee S, Kim J, Oh S, Oh T, Nehrbass U, Han SJ, No Z, Lee J, Brodin P, Cho SN, Nam K,  
424 Kim J. 2013. Discovery of Q203, a potent clinical candidate for the treatment of tuberculosis. *Nature*  
425 *medicine* **19**: 1157-1160. doi: 10.1038/nm.3262.
- 426 Pettersen EF, Goddard TD, Huang CC, Couch GS, Greenblatt DM, Meng EC, Ferrin TE. 2004.  
427 UCSF Chimera--a visualization system for exploratory research and analysis. *Journal of*  
428 *computational chemistry* **25**: 1605-1612. doi: 10.1002/jcc.20084.
- 429 Punjani A, Rubinstein JL, Fleet DJ, Brubaker MA. 2017. cryoSPARC: algorithms for rapid  
430 unsupervised cryo-EM structure determination. *Nature Methods* **14**: 290-296. doi:  
431 10.1038/nmeth.4169.
- 432 Rao SPS, Alonso S, Rand L, Dick T, Pethe K. 2008. The protonmotive force is required for  
433 maintaining ATP homeostasis and viability of hypoxic, nonreplicating *Mycobacterium tuberculosis*.  
434 *Proceedings of the National Academy of Sciences of the United States of America* **105**: 11945-11950.  
435 doi: 10.1073/pnas.0711697105.
- 436 Rastogi N, Legrand E, Sola C. 2001. The mycobacteria: an introduction to nomenclature and  
437 pathogenesis. *Revue Scientifique et Technique* **20**: 21-54. doi: 10.20506/rst.20.1.1265.
- 438 Rosenthal PB, Henderson R. 2003. Optimal determination of particle orientation, absolute hand, and  
439 contrast loss in single-particle electron cryomicroscopy. *Journal of molecular biology* **333**: 721-745.  
440 doi: 10.1016/j.jmb.2003.07.013.
- 441 Scherr N, Bieri R, Thomas SS, Chauffour A, Kalia NP, Schneide P, Ruf MT, Lamelas A,  
442 Manimekalai MSS, Gruber G, Ishii N, Suzuki K, Tanner M, Moraski GC, Miller MJ, Witschel M,  
443 Jarlier V, Pluschke G, Pethe K. 2018. Targeting the *Mycobacterium ulcerans* cytochrome *bc<sub>1</sub>:aa<sub>3</sub>* for  
444 the treatment of Buruli ulcer. *Nature communications* **9**: 5370. doi: 10.1038/s41467-018-07804-8.
- 445 Schrodinger LLC. 2010. *The PyMOL molecular graphics system, version 1.5. 0.4*. The PyMOL  
446 molecular graphics system, version 1.5. 0.4.
- 447 Tortoli E, Fedrizzi T, Meehan CJ, Trovato A, Grottola A, Giacobazzi E, Serpini GF, Tagliazucchi S,

448 Fabio A, Bettua C, Bertorelli R, Frascaro F, De Sanctis V, Pecorari M, Jousson O, Segata N, Cirillo  
449 DM. 2017. The new phylogeny of the genus *Mycobacterium*: The old and the news. *Infection,  
450 Genetics and Evolution* **56**: 19-25. doi: 10.1016/j.meegid.2017.10.013.

451 Zheng SQ, Palovcak E, Armache JP, Verba KA, Cheng Y, Agard DA. 2017. MotionCor2: anisotropic  
452 correction of beam-induced motion for improved cryo-electron microscopy. *Nature Methods* **14**:  
453 331-332. doi: 10.1038/nmeth.4193.

454 Zivanov J, Nakane T, Scheres SHW. 2019. A Bayesian approach to beam-induced motion correction  
455 in cryo-EM single-particle analysis. *IUCrJ* **6**: 5-17. doi: 10.1107/S205225251801463X.

456  
457  
458  
459  
460  
461  
462  
463  
464  
465  
466  
467  
468  
469  
470  
471  
472  
473  
474  
475  
476  
477  
478  
479  
480  
481  
482  
483  
484  
485

486

Tables and Figures

|                                |                                                 | Strain                                          | Query cover (%) | Ident (%) |
|--------------------------------|-------------------------------------------------|-------------------------------------------------|-----------------|-----------|
| Slowly growing mycobacteria    | <b>Mycobacterium tuberculosis complex</b>       | <i>Mycobacterium tuberculosis</i>               | 100             | 100.00    |
|                                |                                                 | <i>Mycobacterium africanum</i>                  | 87              | 99.79     |
|                                |                                                 | <i>Mycobacterium bovis</i>                      | 99              | 87.46     |
|                                |                                                 | <i>Mycobacterium canettii</i>                   | 100             | 99.82     |
|                                |                                                 | <i>Mycobacterium microti</i>                    | 100             | 89.62     |
|                                |                                                 | <i>Mycobacterium orygis</i>                     | 100             | 99.82     |
|                                | <b>Non-tuberculous mycobacteria</b>             | <i>Mycobacterium leprae</i>                     | 99              | 92.52     |
|                                |                                                 | <i>Mycobacterium marinum</i>                    | 99              | 88.71     |
|                                |                                                 | <i>Mycobacterium ulcerans</i>                   | 99              | 88.89     |
|                                |                                                 | <b>Mycobacterium avium complex</b>              |                 |           |
| Rapidly growing mycobacteria   | <i>Mycobacterium avium</i>                      | 99                                              | 88.53           |           |
|                                | <i>Mycobacterium intracellulare</i>             | 99                                              | 86.92           |           |
|                                | <i>Mycobacterium chimaera</i>                   | 85                                              | 82.09           |           |
|                                | <i>Mycobacterium haemophilum</i>                | 98                                              | 94.29           |           |
|                                | <i>Mycobacterium xenopi</i>                     | 99                                              | 89.96           |           |
|                                | <i>Mycobacterium kansasii</i>                   | 100                                             | 92.71           |           |
|                                | <i>Mycobacterium simiae</i>                     | 100                                             | 91.99           |           |
|                                | <b>Mycobacterium chelonae-abscessus complex</b> | <i>Mycobacterium abscessus subsp. abscessus</i> | 95              | 71.62     |
|                                |                                                 | <i>Mycobacterium abscessus subsp. bolletii</i>  | 94              | 78.23     |
|                                |                                                 | <i>Mycobacterium chelonae</i>                   | 100             | 80.86     |
| <i>Mycobacterium fortuitum</i> |                                                 | 98                                              | 98.00           |           |

True pathogens
  Opportunistic pathogens

487

488

Figure 1. Sequences similarity comparison of *M. tuberculosis* QcrB with other pathogenic mycobacteria.

489

490

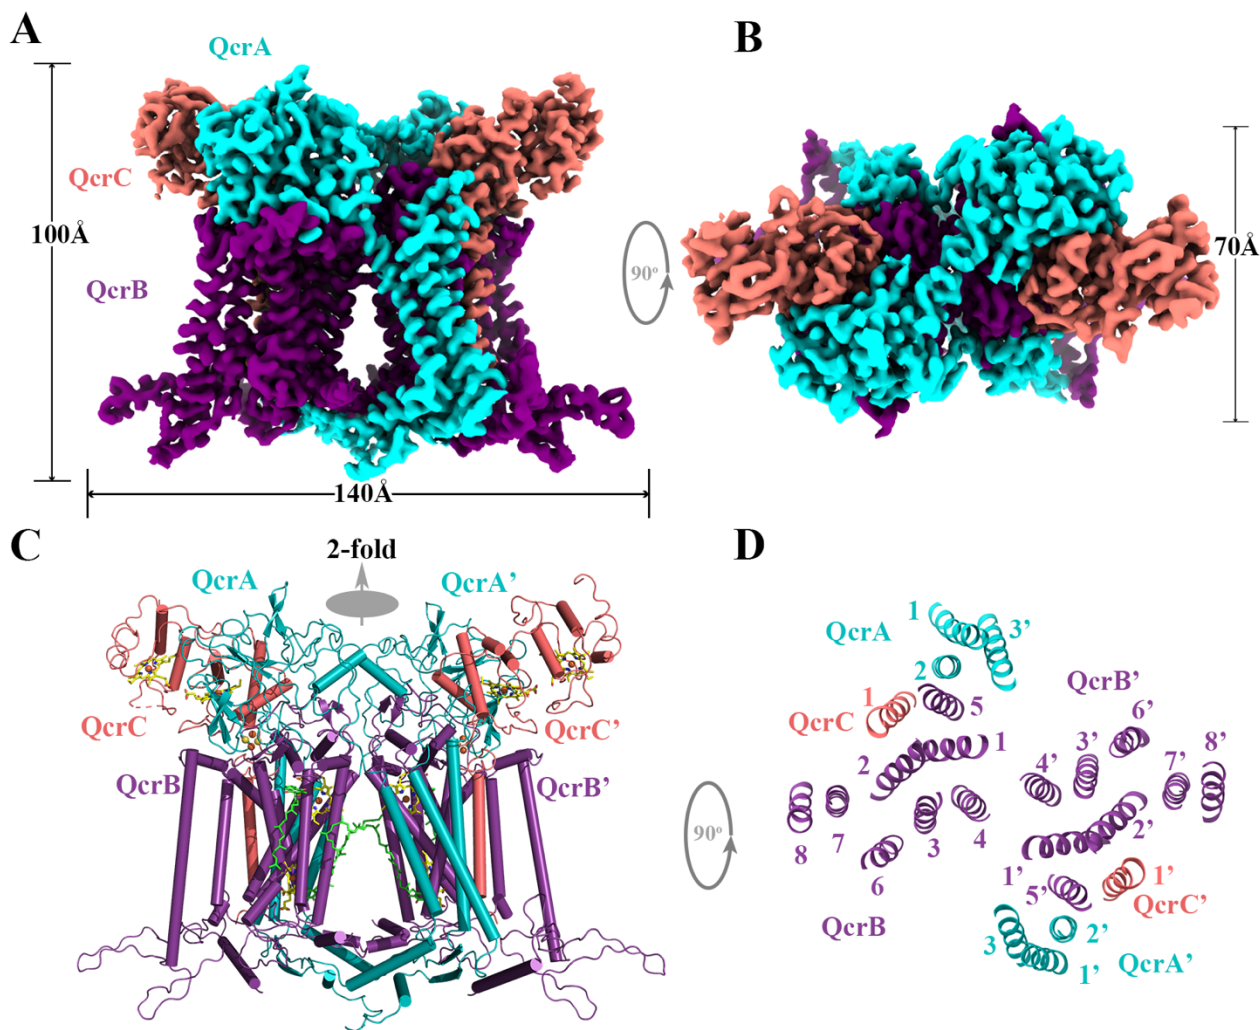

491  
492 **Figure 2. Overall architecture of the of *Mtb* cytochrome *bcc* complex.** (A) Front view and (B) top  
493 view of cryo-EM map of cytochrome *bcc* at 2.68 Å resolution. QcrA, QcrB, and QcrC are colored  
494 teal, purple, and salmon, respectively. (C) Cartoon representation of cytochrome *bcc*, using the  
495 same color scheme as above. The twofold symmetry of the dimer is depicted by the grey axis. The  
496 heme groups ( $b_H$ ,  $b_L$ ,  $c_{D1}$ , and  $c_{D2}$ ) and menaquinone/menaquinol ( $MK_P/MK_N$ ) are shown as stick  
497 models. The [2Fe-2S] clusters are shown as spheres. (D) A cross-sectional view (top) of cytochrome  
498 *bcc* dimer.  
499

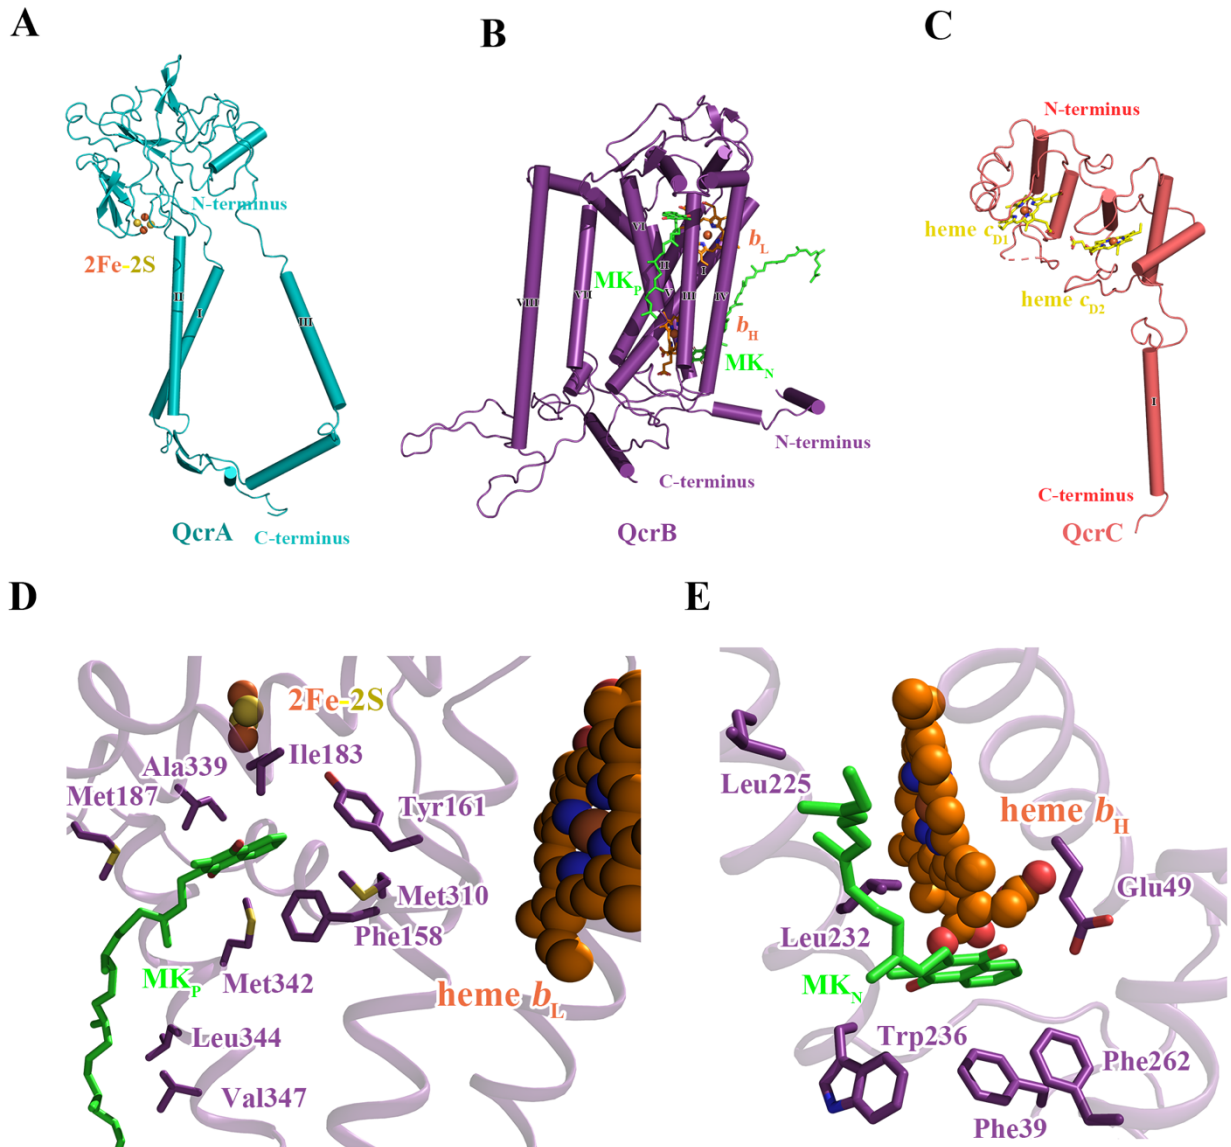

500  
501 **Figure 3. Structure of *Mtb* cytochrome *bcc* subunits.** Cartoon representation of the monomers of  
502 (A) QcrA, (B) QcrB, and (C) QcrC, with prosthetic groups. (D) The Q<sub>P</sub> binding site and (E) Q<sub>N</sub>  
503 binding site. The residues potentially involved in the binding of MK/MKH<sub>2</sub> are shown with side  
504 chains in a stick representation. The MK/MKH<sub>2</sub> molecules are colored in green and shown as sticks.  
505 The [2Fe-2S] and heme groups are shown as spheres and labeled accordingly.

506

507



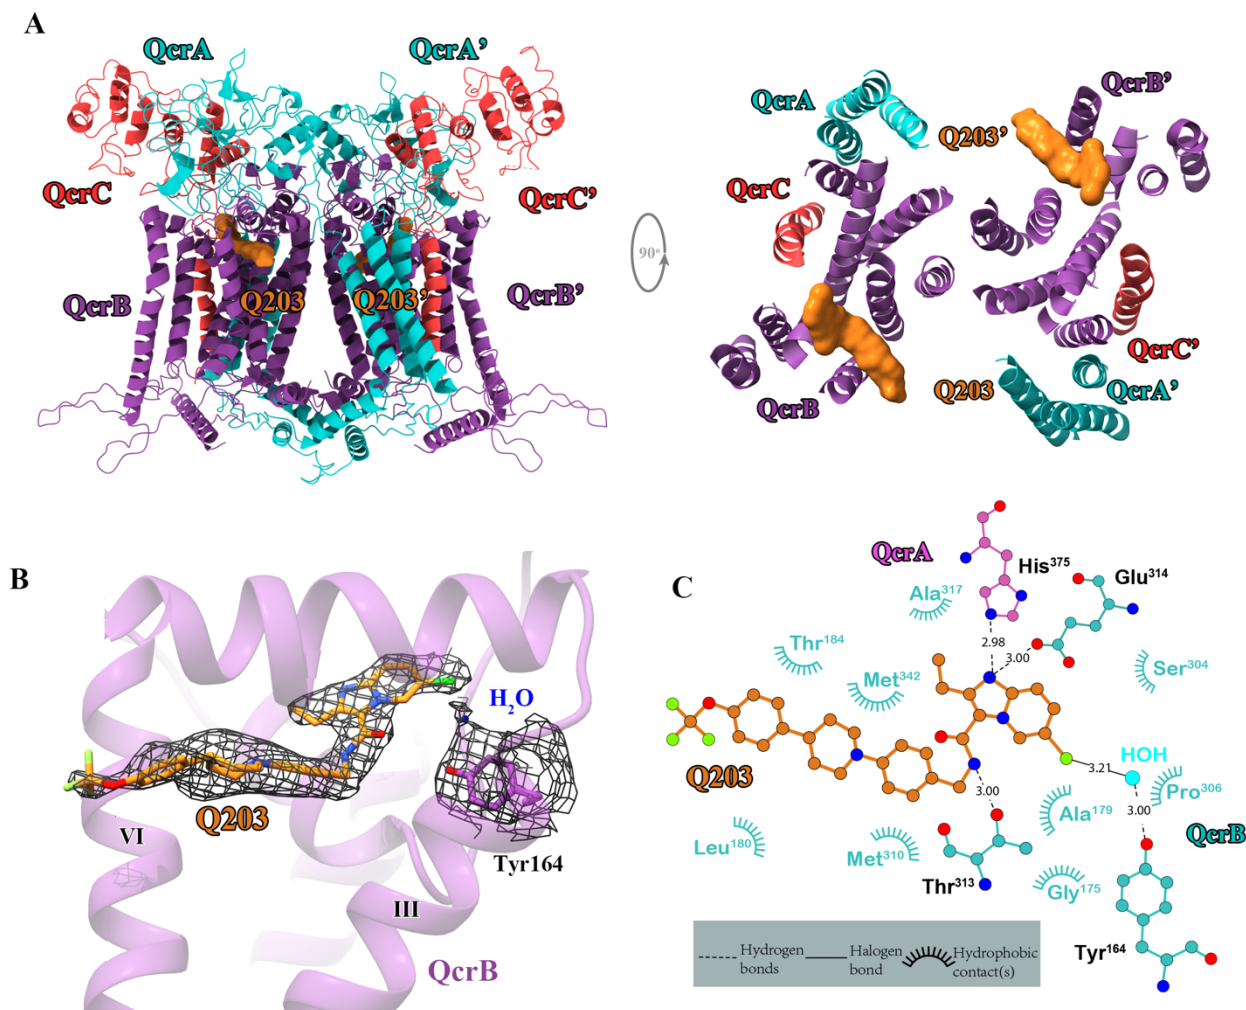

508

509 **Figure 4. Cryo-EM structure of the *Mtb* cytochrome *bcc* complex in the presence of Q203. (A)**

510 Side (left) and top (right) views of the cryo-EM structure of the *Mtb* cytochrome *bcc* complex

511 presented as a cartoon representation. Q203 (orange) is bound to the Qp site. (B) Visualization of

512 densities for Q203, a water molecule and QcrBTyr164. (C) Plot of distances of various parts of Q203

513 to residues in the Qp site, determined using LIGPLOT ([www.ebi.ac.uk/thornton-](http://www.ebi.ac.uk/thornton-srv/software/LIGPLOT/)

514 [srv/software/LIGPLOT/](http://www.ebi.ac.uk/thornton-srv/software/LIGPLOT/)).

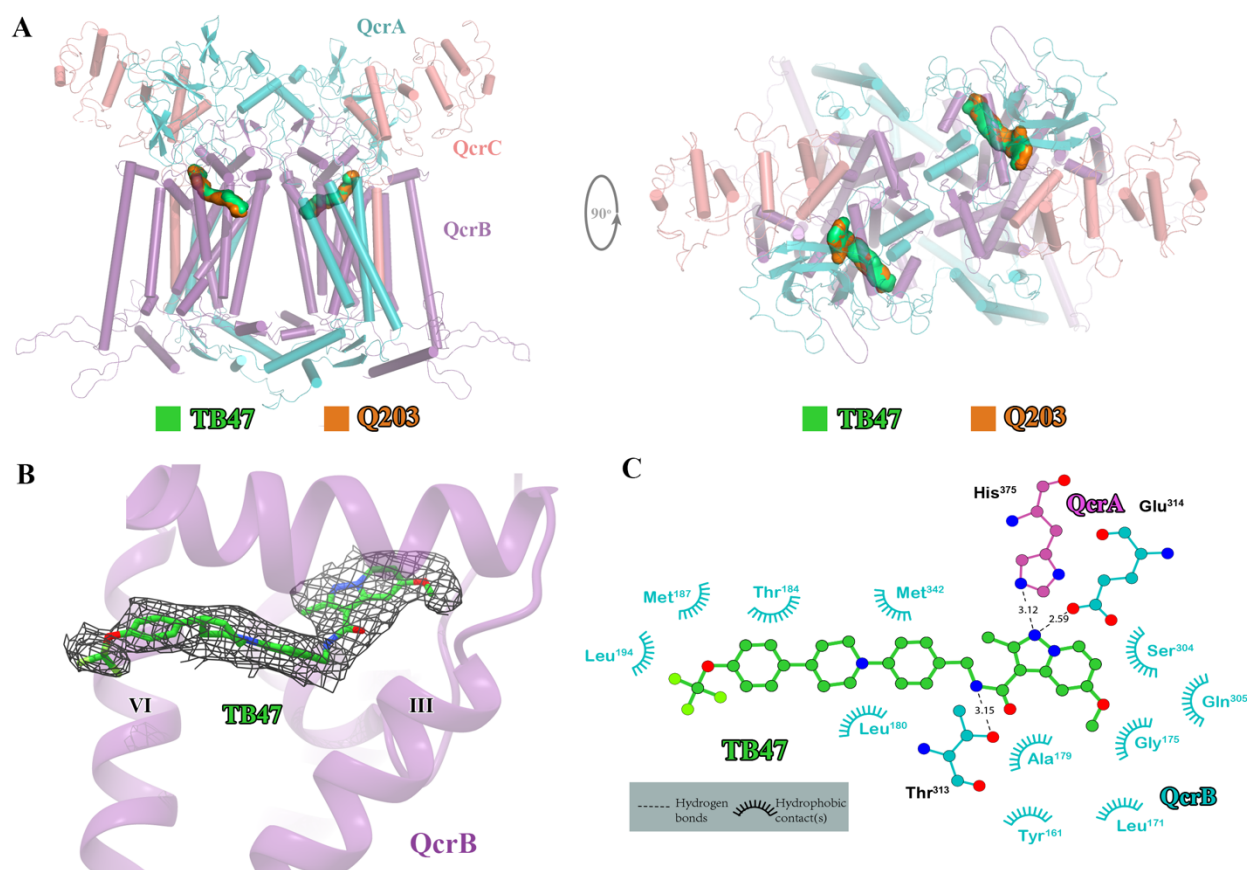

515

516 **Figure 5. Cryo-EM structure of the *Mtb* cytochrome *bcc* complex in the presence of TB47. (A)**

517 Side (left) and top (right) views of the cryo-EM structure of the *Mtb* cytochrome *bcc* complex

518 presented as a cartoon representation. The TB47 (green) and Q203 (orange) are bound to the Qp site.

519 **(B)** Visualization of the density for TB47. **(C)** Plot of distances of various parts of TB47 to residues

520 in the Qp site, determined using LIGPLOT ([www.ebi.ac.uk/thornton-srv/software/LIGPLOT/](http://www.ebi.ac.uk/thornton-srv/software/LIGPLOT/)).

521

522

523

524

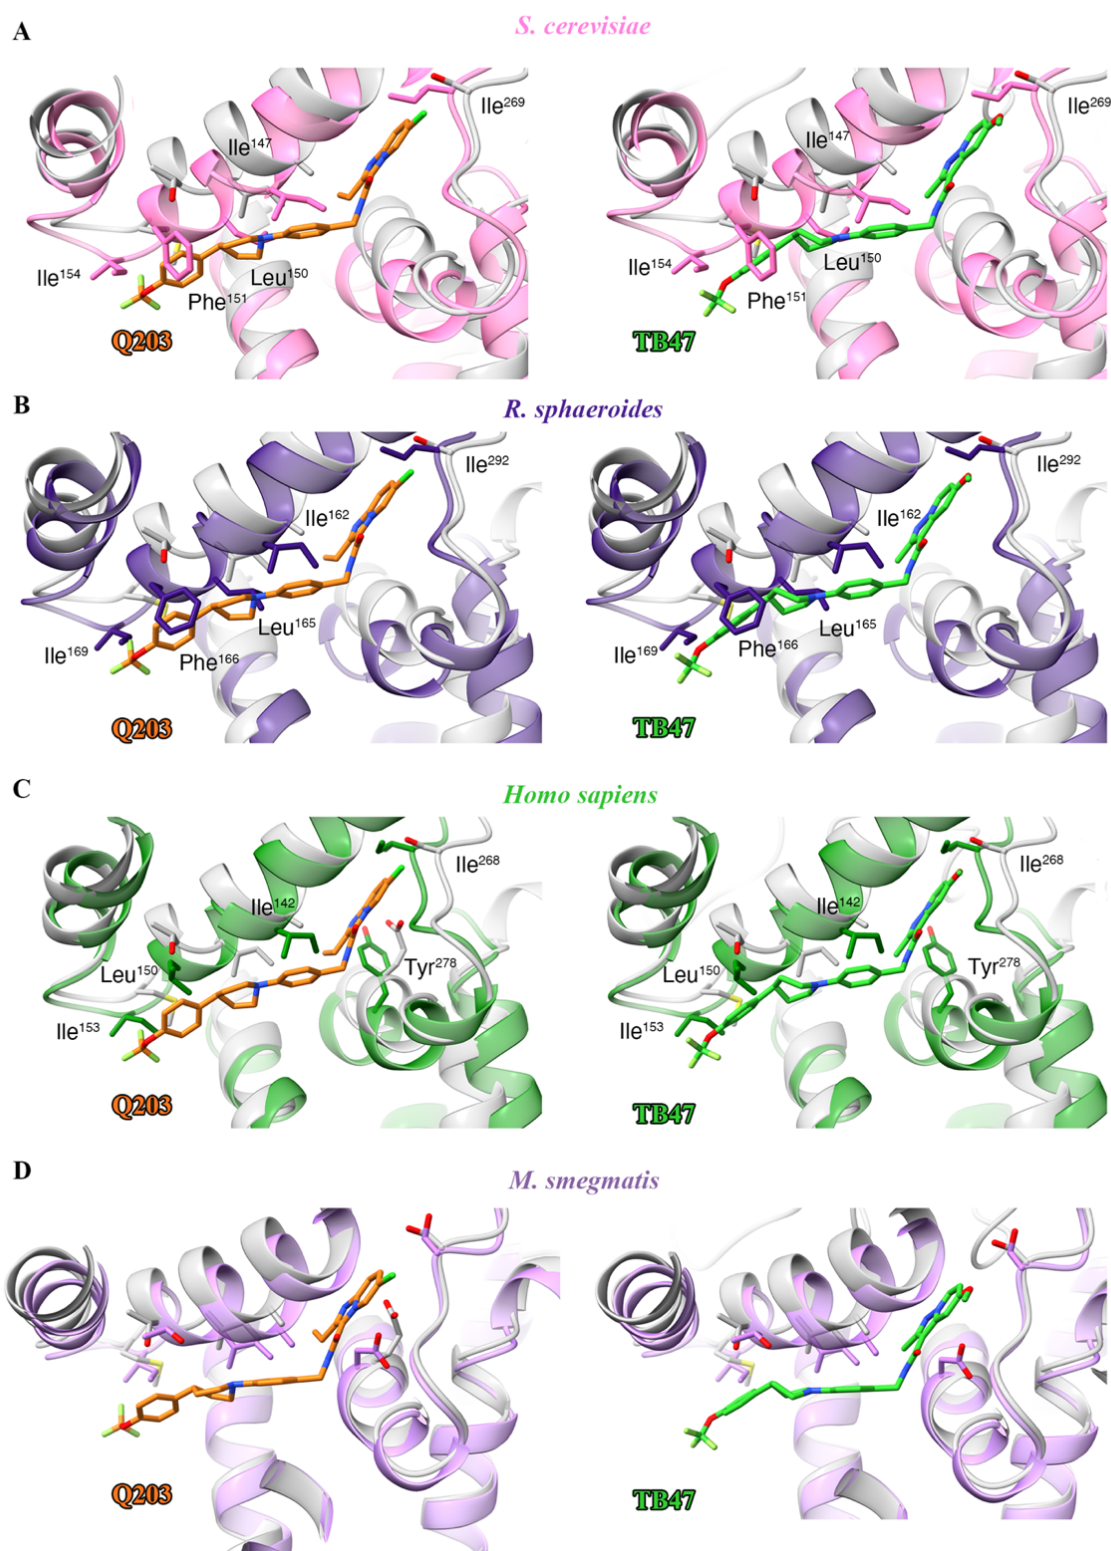

525  
526 **Figure 6. Structural alignment between the *Mtb* Qp binding pocket where Q203 or TB47 binds**  
527 **with homologous subunits from four other species.** These subunits are from *S. cerevisiae* (pink,  
528 PDB: 1KY0), *R. sphaeroides* (blue, PDB: 2QJP), *Homo sapiens* (green; PDB: 5XTE), and *M.*  
529 *smegmatis* (violet, PDB: 6ADQ). Residues causing steric clashes in the homologous subunits are  
530 labeled. Q203 and TB47 are shown as orange and green stick models, respectively.

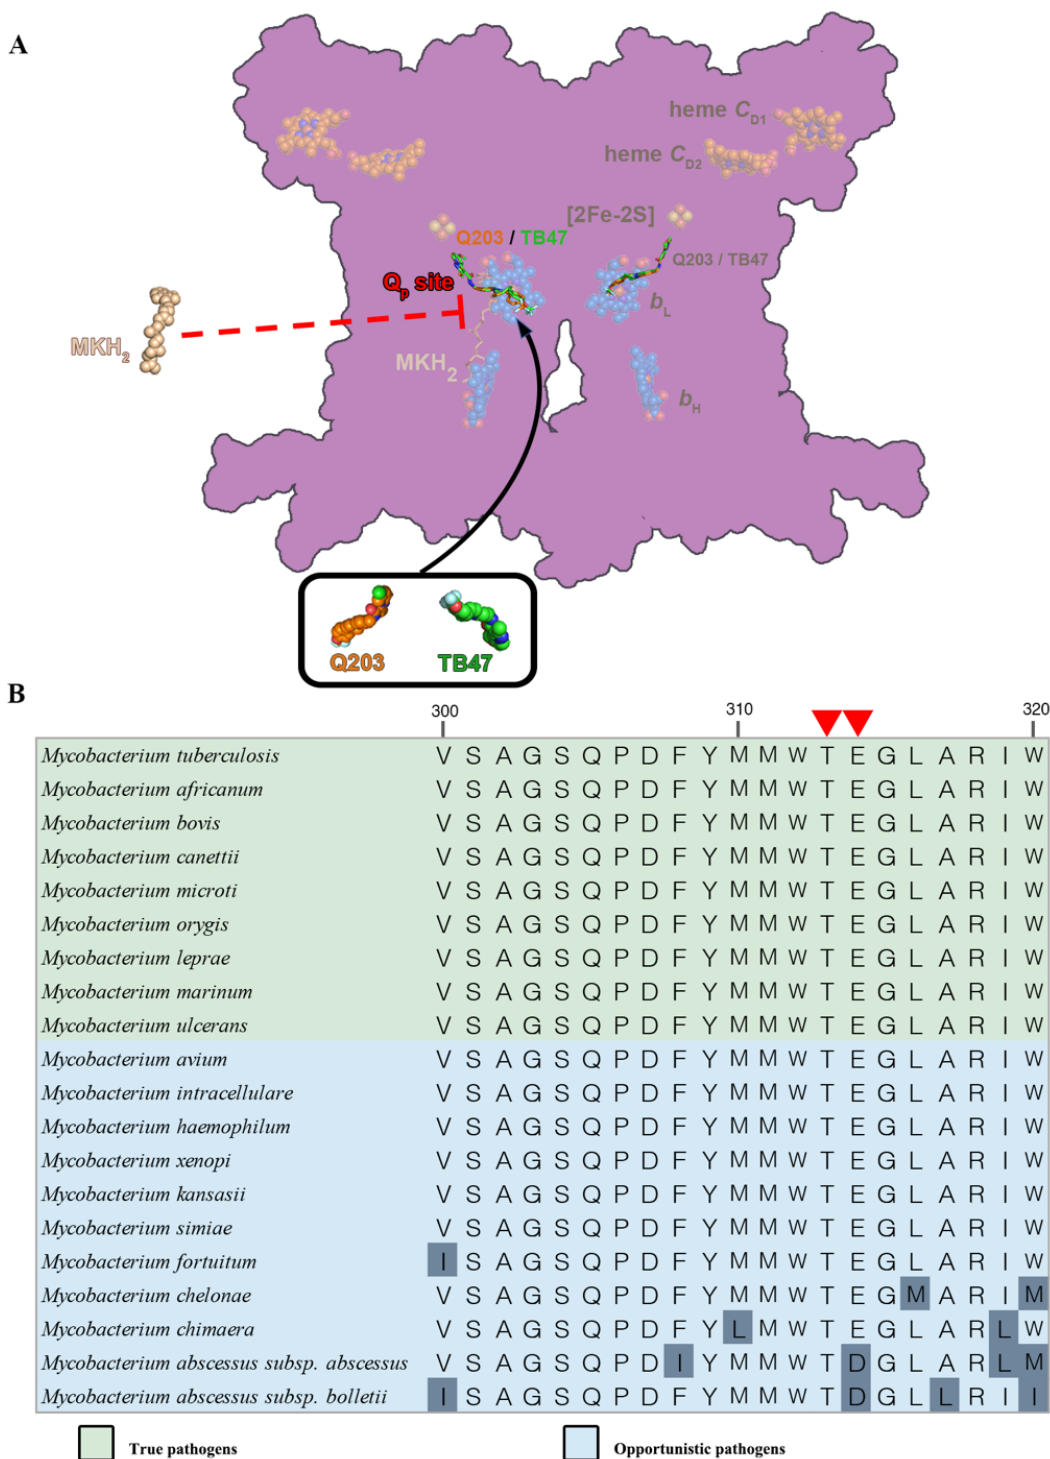

531

532

533

534

535

536

537

538

**Figure 7. Proposed mechanism of inhibition and sequence alignment for the Q<sub>P</sub> site within pathogenic mycobacteria.** (A) Schematic of *M. tuberculosis* cytochrome *bcc* inhibition by Q203 and TB47. *M. tuberculosis* cytochrome *bcc* dimer are colored magenta. The binding of Q203 (orange spheres) or TB47 (green spheres) prevent substrate access (gray spheres). The prosthetic groups are shown in spheres and labeled accordingly. (B) Partial sequence alignment at the Q<sub>P</sub> site. The red triangles indicate the conservative residues involving with the hydrogen-bond formation between Q203 and TB47.

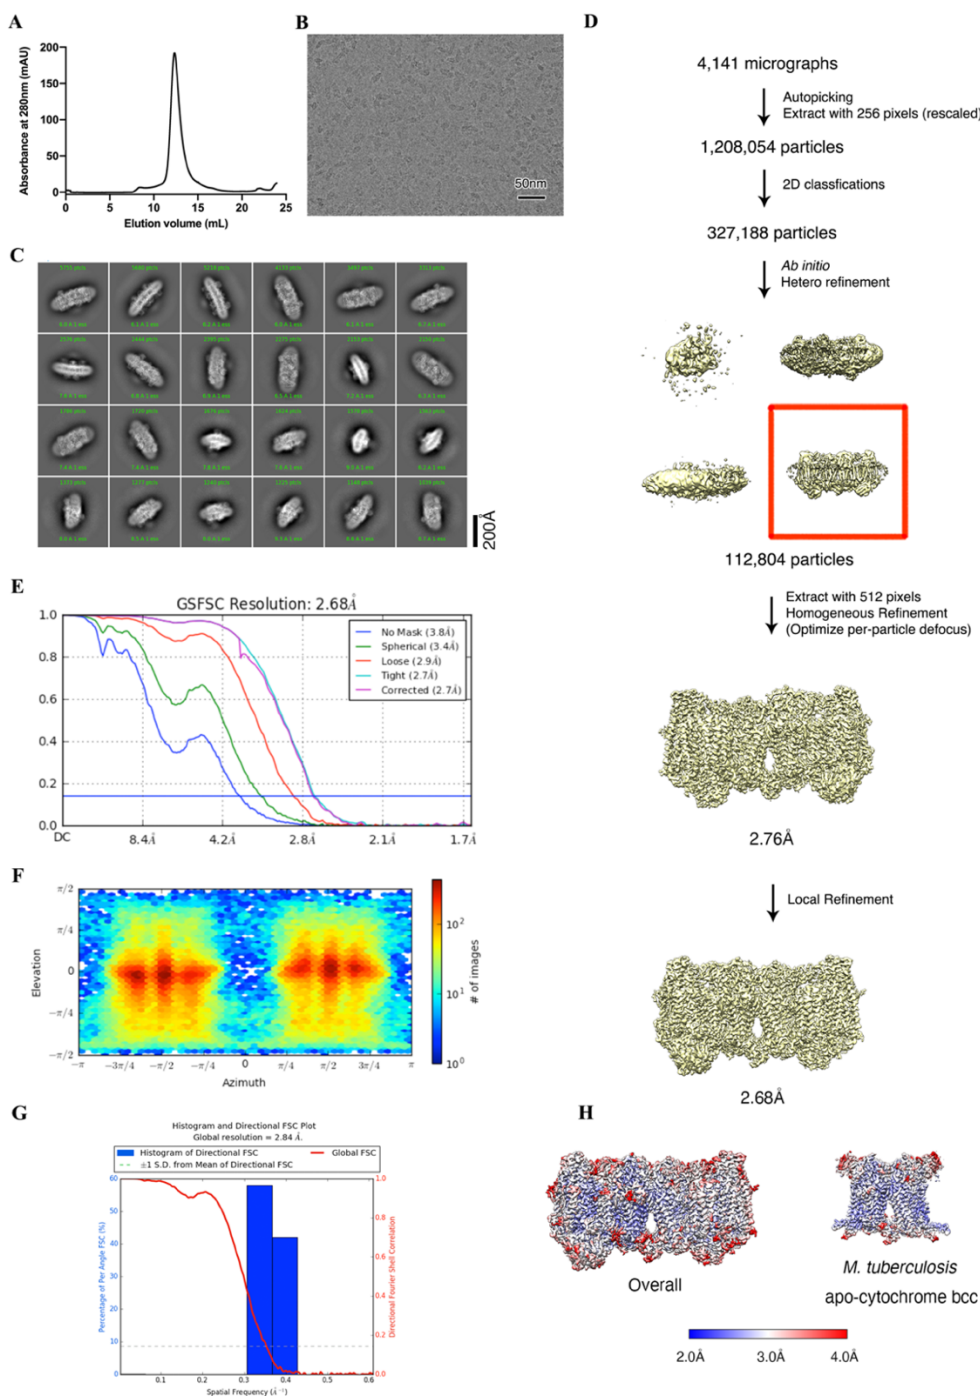

539  
 540 **Figure 2-figure supplement 1. Cryo-EM data processing of apo hybrid supercomplex**  
 541 **consisting of *Mtb* CIII and *Msm* CIV.** (A) The elution profile of the *Mtb* cytochrome *bcc* from size  
 542 exclusion chromatography (SEC). Peak fractions were pooled and concentrated for preparation on  
 543 the cryo-EM grids. (B) Representative electron micrograph of the cryo-EM sample.  
 544 (C) Representative 2D classification averages calculated from selected particles. (D) Workflow of  
 545 data processing for the apo hybrid supercomplex. (E) FSC curves of 3D reconstructions. (F)  
 546 Viewing direction of all particles used in the final 3D reconstruction. (G) 3DFSC histogram of final  
 547 map. (H) The overall and *Mtb* cytochrome *bcc* maps, colored according to the local resolution.

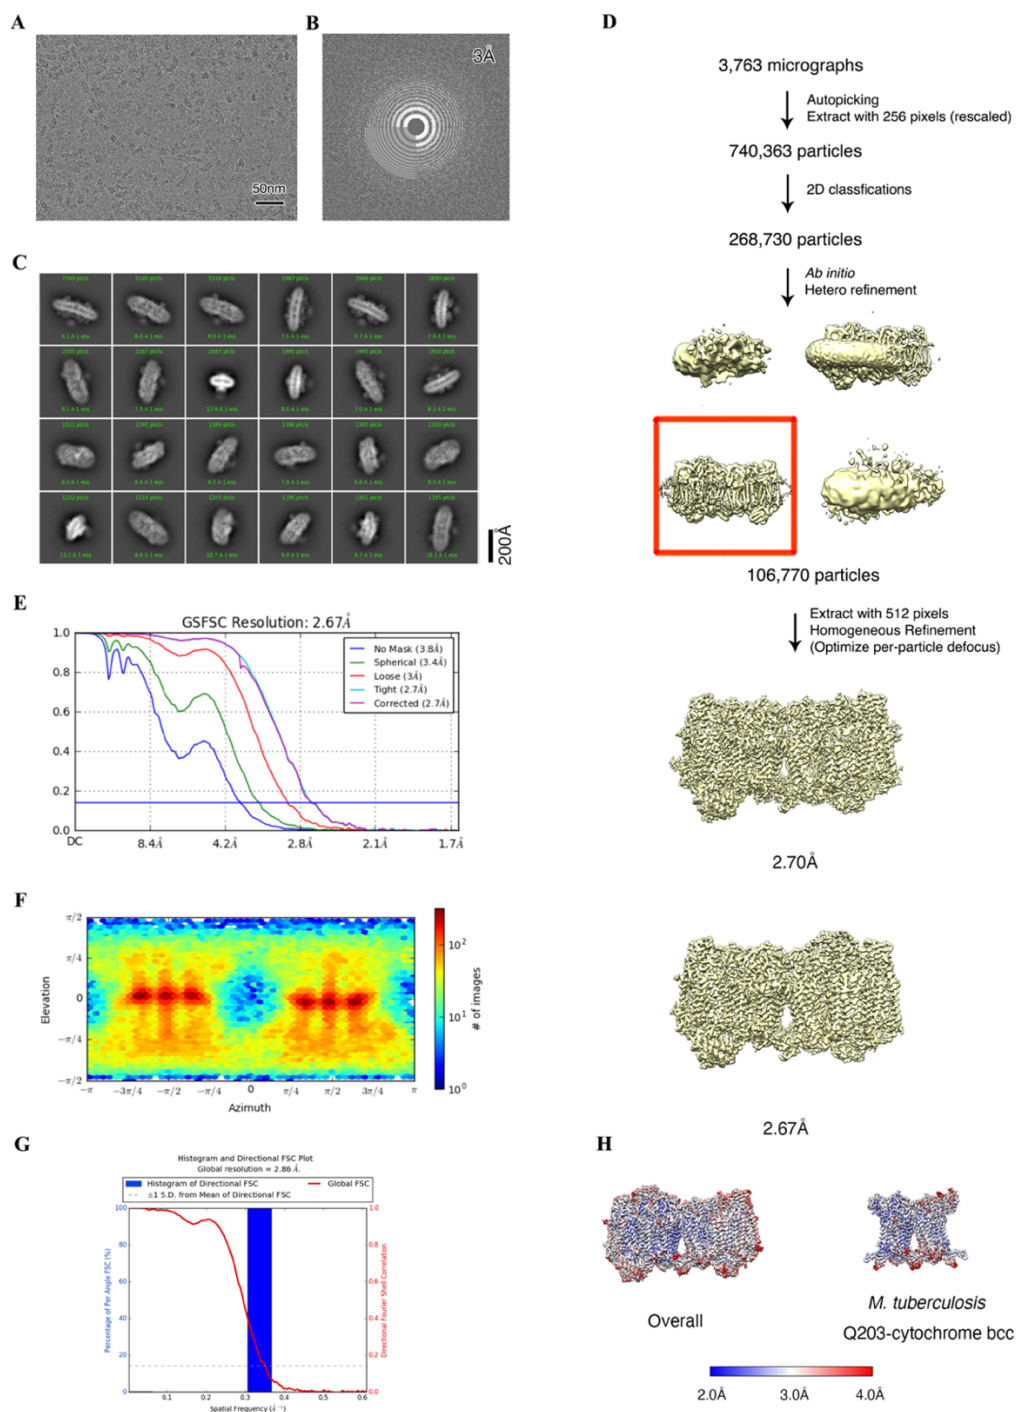

548  
 549 **Figure 4-figure supplement 1. Cryo-EM data processing of hybrid supercomplex consisting of**  
 550 ***Mtb* CIII and *Msm* CIV in the presence of Q203. (A)** Representative electron micrograph of the  
 551 cryo-EM sample. **(B)** CTF fit of motion-corrected micrographs **(C)** Representative 2D classification  
 552 averages calculated from selected particles. **(D)** Workflow of data processing for the Q203-bound  
 553 hybrid supercomplex. **(E)** FSC curves of 3D reconstructions. **(F)** Viewing direction of all particles  
 554 used in the final 3D reconstruction. **(G)** 3DFSC histogram of final map. **(H)** The overall and *Mtb*  
 555 cytochrome *bcc* maps, colored according to the local resolution.

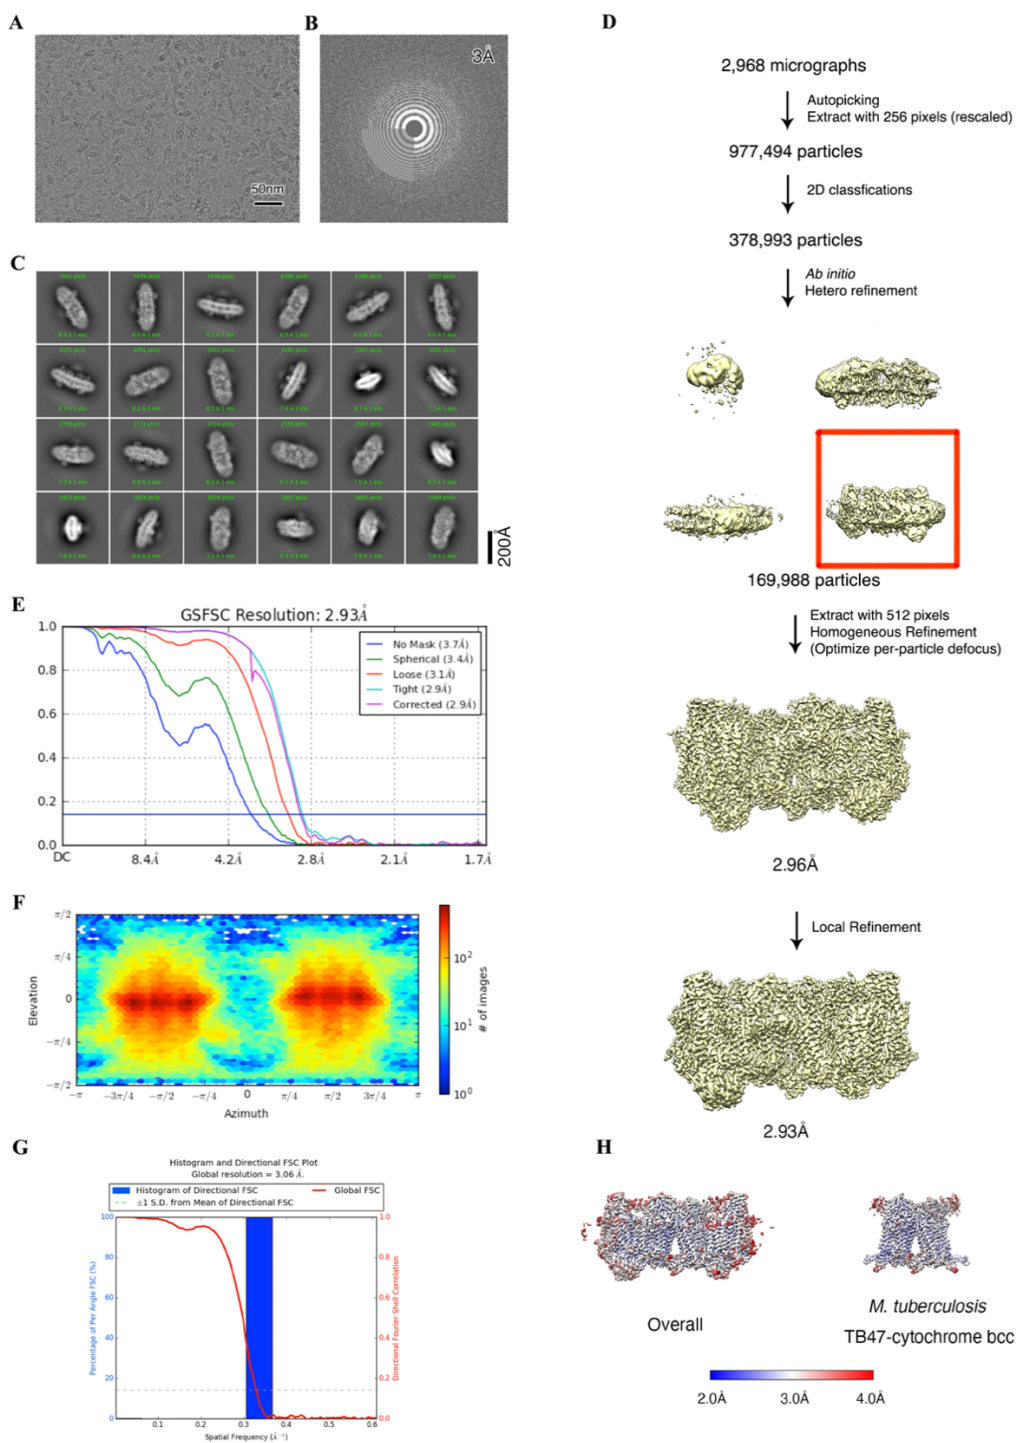

556  
 557 **Figure 5-figure supplement 1. Cryo-EM data processing of the hybrid supercomplex consisting**  
 558 **of *Mtb* CIII and *Msm* CIV in the presence of TB47.** (A) Representative electron micrograph of the  
 559 cryo-EM sample. (B) CTF fit of motion-corrected micrographs (C) Representative 2D classification  
 560 averages calculated from selected particles. (D) Workflow of data processing for the TB47-bound  
 561 hybrid supercomplex. (E) FSC curves of 3D reconstructions. (F) Viewing direction of all particles  
 562 used in the final 3D reconstruction. (G) 3DFSC histogram of final map. (H) The overall and *Mtb*  
 563 cytochrome *bcc* maps, colored according to the local resolution.

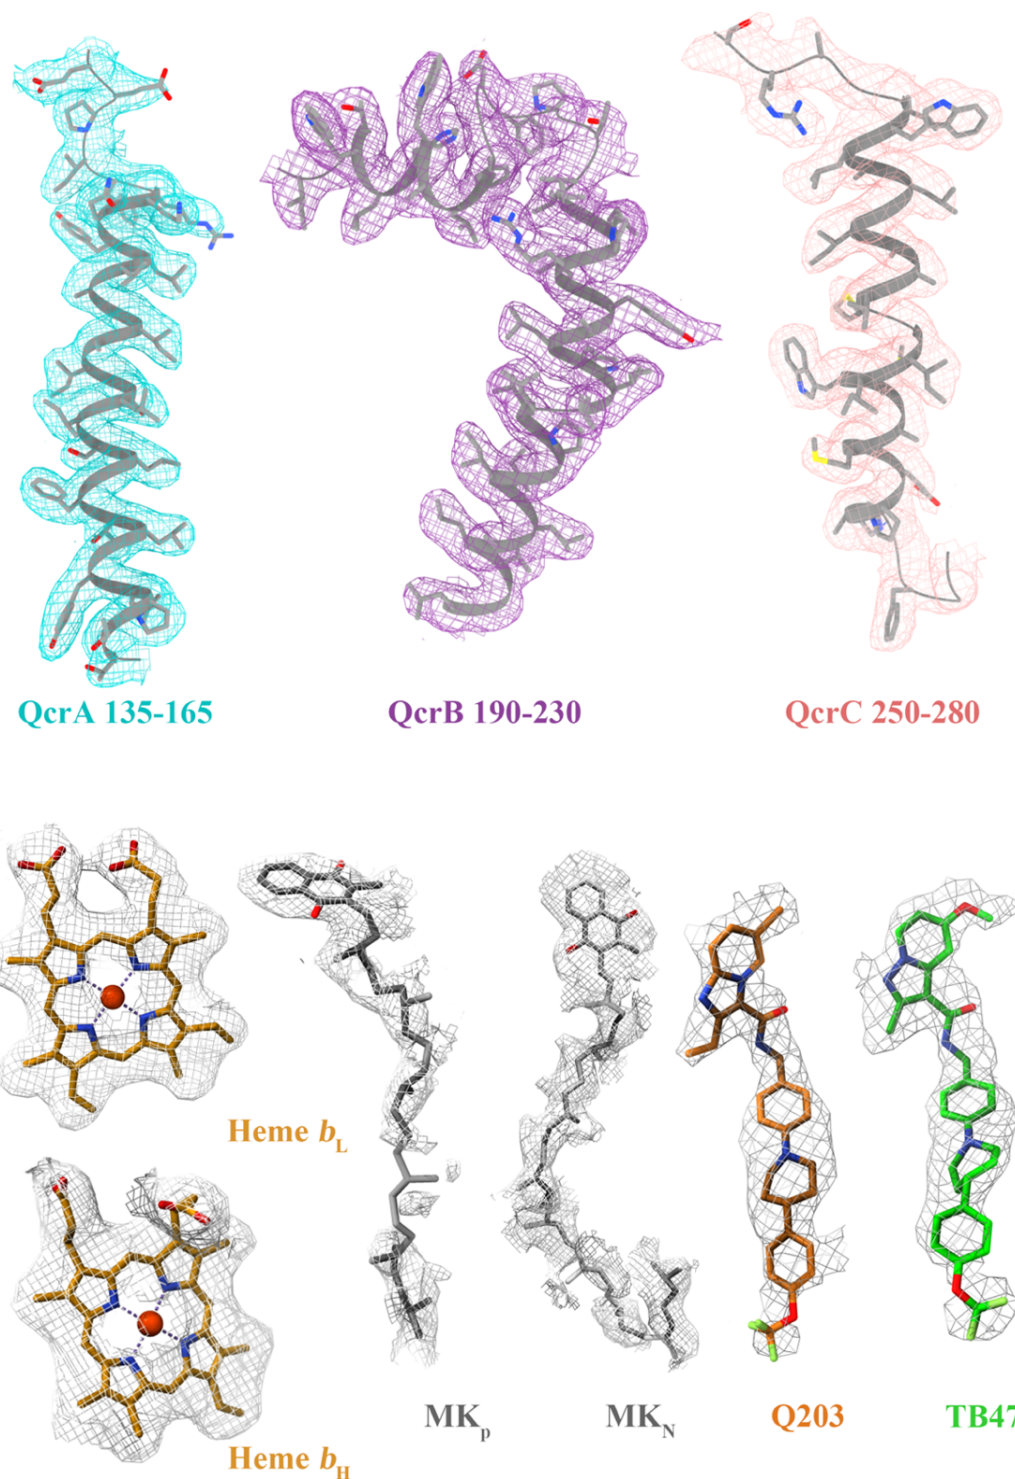

564

565 **Figures 2, 4, and 5-figure supplement 2. Cryo-EM map quality assessment and ligand**

566 **representation of *Mtb* cytochrome *bcc* complex.** Representative cryo-EM densities of individual

567 subunits, prosthetic groups and inhibitors. Corresponding subunits with residues, prosthetic groups

568 and inhibitors are shown in stick models or cartoon representation.



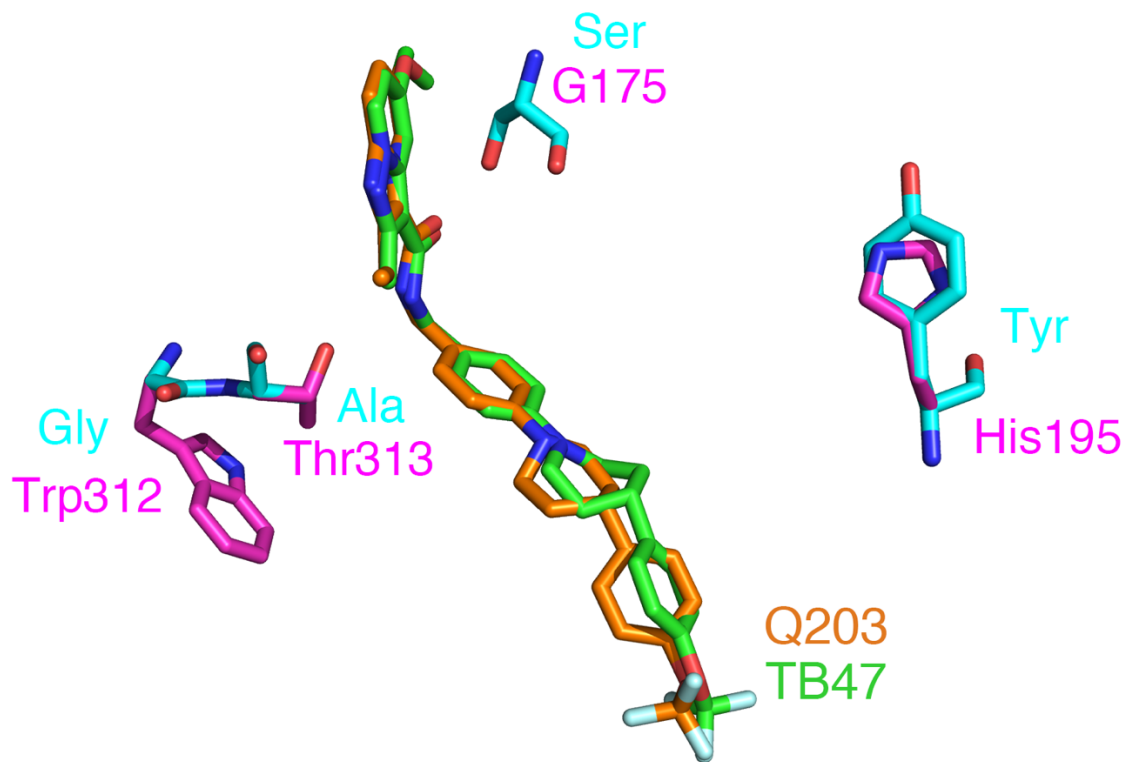

569  
570 **Figures 4 and 5-figure supplement 3. Reported mutations in Q203- and TB47-resistant *M.***  
571 ***tuberculosis*.** The native and mutant residues are colored magenta and cyan, respectively.  
572

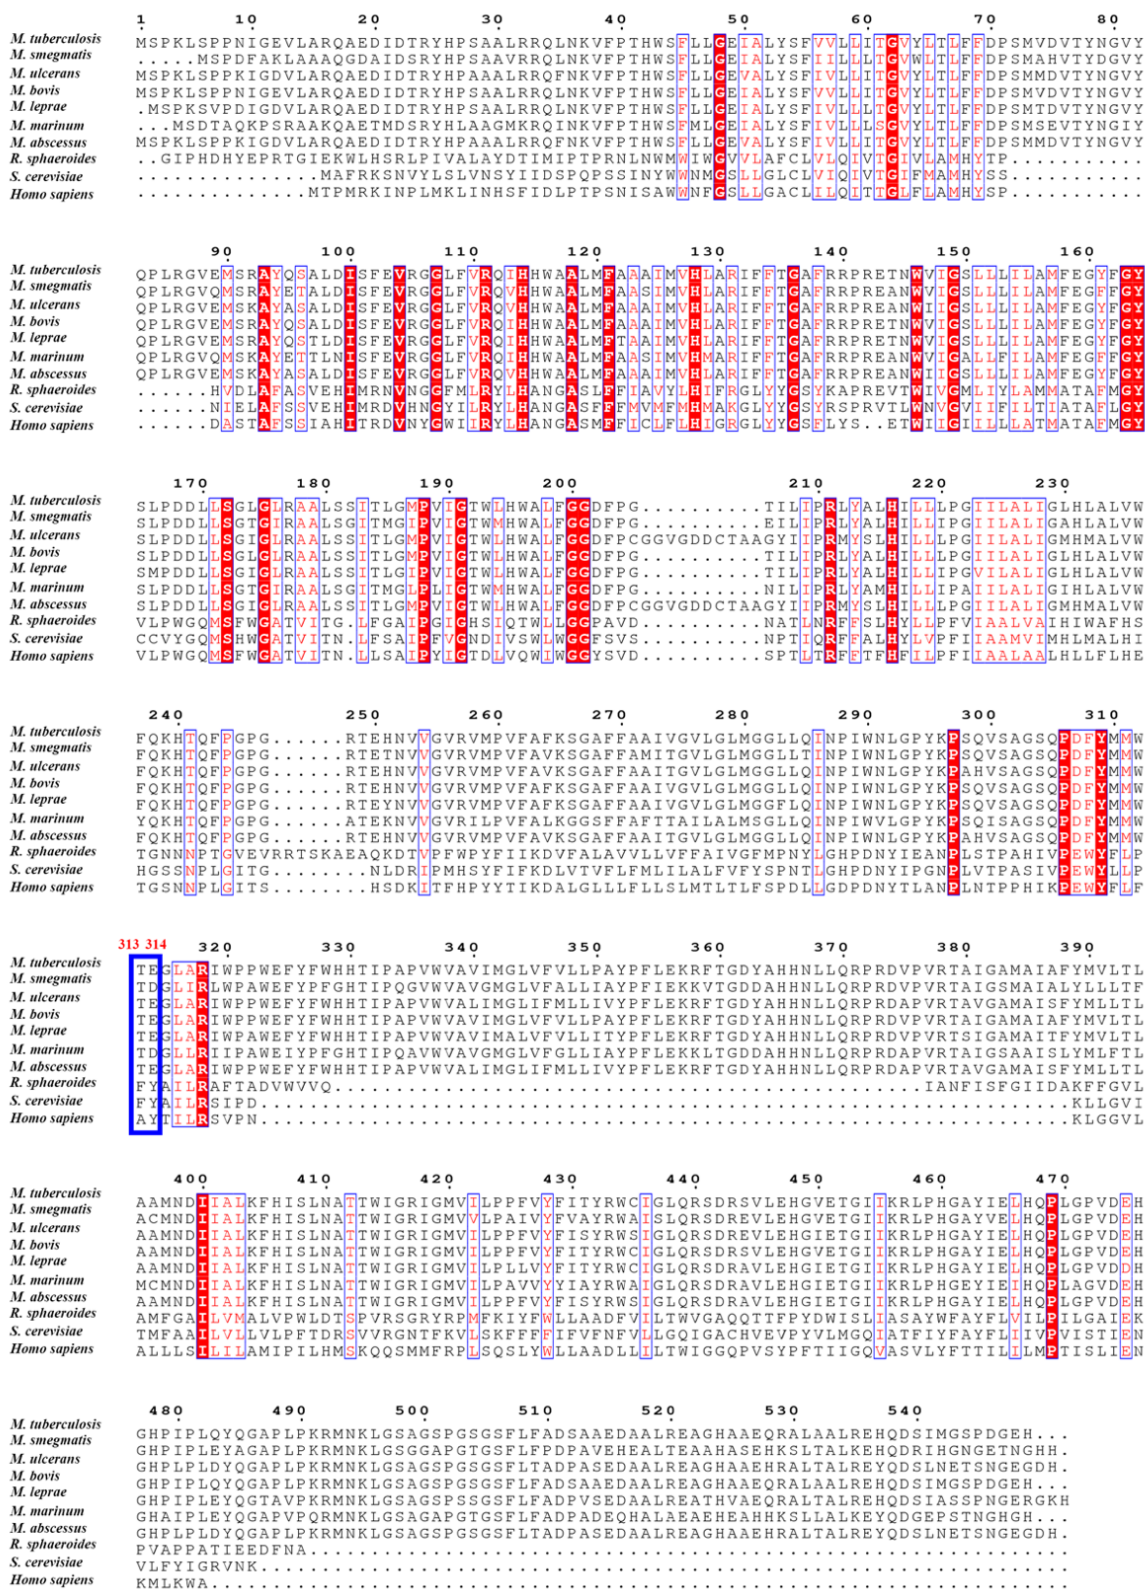

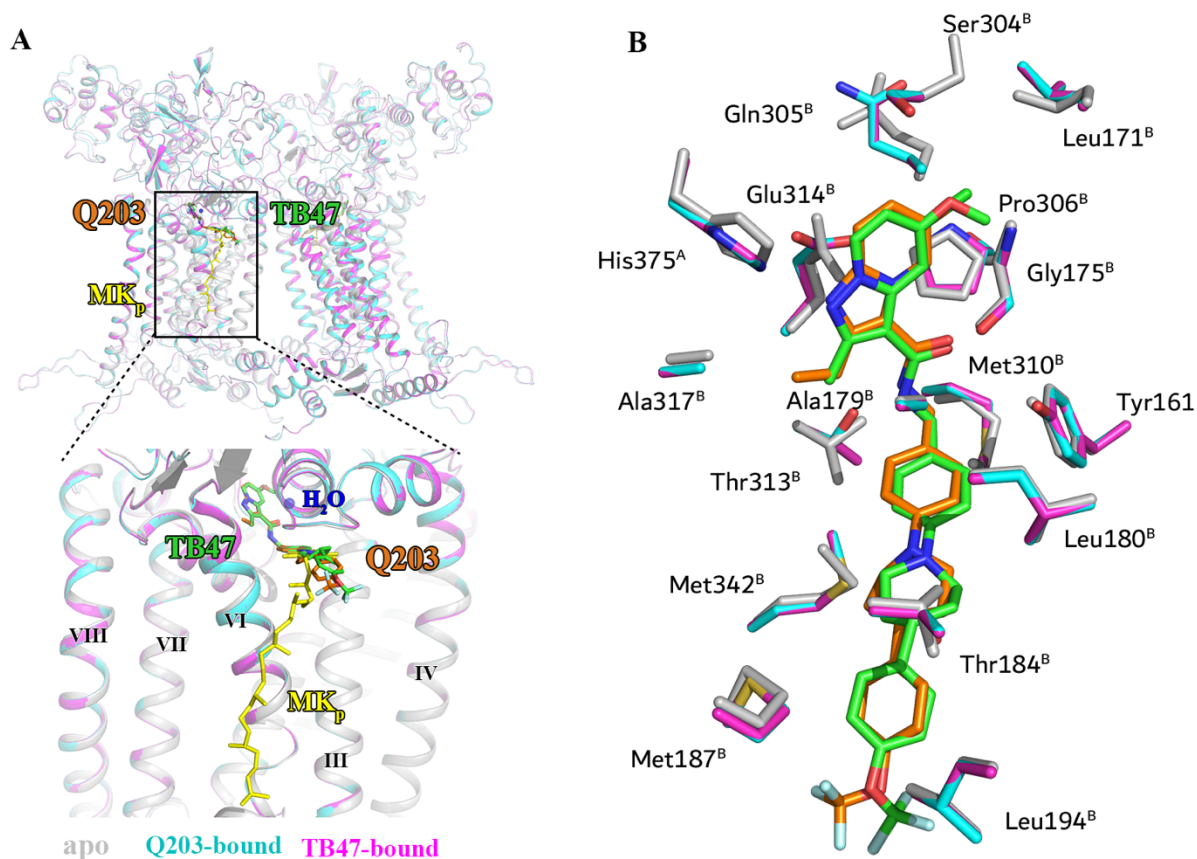

577

578

**Figure 7-figure supplement 1. Comparison of apo and Q203/TB47-bound structures of *Mtb***

579

**cytochromes *bcc*.** (A) Superposition of apo (gray), Q203-bound (cyan), and TB47-bound (magenta)

580

structures of *Mtb* cytochromes *bcc*. The Q203 (orange), TB47 (green) and MK (yellow) molecules

581

are shown as stick models, respectively. Water molecules are shown as spheres. The transmembrane

582

helices are also labeled. (B) Comparison of residues surrounding Q203 (cyan sticks) and TB47

583

(magenta stick models) with those in apo form (gray sticks). The residues from subunits A and B are

584

labeled with superscript A and B, respectively.

585

586

587

588

589

590

591

592

593

594

595

596

597

**Supplementary file 1. Cryo-EM data collection, refinement and validation statistics.**

| <b>Cryo-EM data collection, refinement and validation statistics</b> |             |             |             |
|----------------------------------------------------------------------|-------------|-------------|-------------|
| <b>State</b>                                                         | <b>apo</b>  | <b>Q203</b> | <b>TB47</b> |
| <b>Data collection</b>                                               |             |             |             |
| Microscope                                                           | Titan Krios | Titan Krios | Titan Krios |
| Voltage (kV)                                                         | 300         | 300         | 300         |
| Magnification                                                        | 29,000x     | 29,000x     | 29,000x     |
| Detector                                                             | Gatan K3    | Gatan K3    | Gatan K3    |
| Data collection software                                             | SerialEM    | SerialEM    | SerialEM    |
| Electron exposure (e <sup>-</sup> /Å <sup>2</sup> )                  | 60          | 60          | 60          |
| Defocus range (µm)                                                   | -1.2 - -1.8 | -1.2 - -1.8 | -1.2 - -1.8 |
| Pixel size (Å)                                                       | 0.82        | 0.82        | 0.82        |
| <b>Data processing</b>                                               |             |             |             |
| Number of micrographs                                                | 4,141       | 3,763       | 2,698       |
| Final particle images                                                | 112,804     | 106,770     | 169,988     |
| Symmetry imposed                                                     | C1          | C1          | C1          |
| Map resolution (Å)                                                   |             |             |             |
| FSC 0.143 threshold                                                  | 2.68        | 2.67        | 2.93        |
| <b>Refinement</b>                                                    |             |             |             |
| Initial model used (PDB code)                                        | 6ADQ        | -           | -           |
| Map sharpening B factor (Å <sup>2</sup> )                            | - 65.3      | -70.0       | -97.5       |
| d FSC model (0.143) Masked                                           | 2.5         | 2.6         | 2.9         |
| Map correlation coefficient                                          | 0.89        | 0.88        | 0.90        |
| Mean CC for ligands                                                  | 0.78        | 0.76        | 0.79        |
| <b>Model composition</b>                                             |             |             |             |
| Non-hydrogen atoms                                                   | 42,281      | 42,960      | 42,625      |
| Protein residues                                                     | 5,122       | 5,132       | 5,119       |
| <b>Ligands</b>                                                       |             |             |             |
|                                                                      | 9Y0: 2      | 9Y0: 3      | 9Y0: 2      |
|                                                                      | CDL: 17     | CDL: 17     | CDL: 17     |
|                                                                      | 9YF: 4      | 9YF: 6      | 9YF: 6      |
|                                                                      | HEA: 4      | HEA: 4      | HEA: 4      |

|                        |         |        |        |
|------------------------|---------|--------|--------|
|                        | HEC: 4  | HEC: 4 | HEC: 4 |
|                        | MQ9: 10 | MQ9: 8 | MQ9:8  |
|                        | HEM: 4  | HEM: 4 | HEM: 4 |
|                        | PLM: 4  | PLM: 4 | PLM: 4 |
|                        | CU: 8   | CU: 8  | CU: 8  |
|                        | FES: 2  | FES: 2 | FES: 2 |
|                        |         | HUU: 2 | HV0: 2 |
|                        |         | 9XX: 2 |        |
| R.M.S. deviations      |         |        |        |
| Bond lengths (Å)       | 0.005   | 0.003  | 0.005  |
| Bond angles (°)        | 1.057   | 0.659  | 0.739  |
| Validation             |         |        |        |
| MolProbity score       | 1.86    | 1.84   | 1.87   |
| Clashscore             | 7.26    | 7.20   | 7.17   |
| Poor rotamers (%)      | 0.05    | 0.10   | 0.10   |
| Ramachandran plot      |         |        |        |
| Favored (%)            | 92.76   | 93.07  | 92.39  |
| Allowed (%)            | 6.97    | 6.61   | 7.25   |
| Outliers (%)           | 0.28    | 0.31   | 0.36   |
| C $\beta$ outliers (%) | 0.00    | 0.00   | 0.00   |

599
